# Supplementary material for: Novel pyrimidine linked acyl thiourea derivatives as potent α-amylase and proteinase K inhibitors: design, synthesis, molecular docking and ADME studies
Source: Royal Society of Chemistry journal article supplement (doi:10.1039/d4ra05799f), 2024-01-01
Supplement: d4ra05799f1.pdf [file d4ra05799f1.pdf]

## Supplementary Information

### Novel Pyrimidine Linked Acyl Thiourea Derivatives as Potent $\alpha$ -Amylase and Proteinase K Inhibitors: Design, Synthesis, Molecular Docking and ADME Studies

Hina Zaman,<sup>a</sup> Aamer Saeed\*<sup>a</sup>, Hammad Ismail,<sup>b</sup> Sadaf Anwaar,<sup>c</sup> Muhammad Latif<sup>d</sup>,  
Muhammad Zaffar Hashmi<sup>e</sup>, Hesham R El-Seedi<sup>f</sup>,

### Correspondence

Prof. Dr. Aamer Saeed

Email: [asaheed@qau.edu.pk](mailto:asaheed@qau.edu.pk); ORCID: <https://orcid.org/0000-0002-7112-9296>

Contact number: +92-51-9064-2128, Fax: +92-51-9064-2241

## List of Figures

1. **Figure 1.**  $^1\text{H}$ -NMR Spectrum of compound (**6a**)
2. **Figure 2.**  $^{13}\text{C}$ -NMR Spectrum of compound (**6a**)
3. **Figure 3.** FT-IR Spectrum of compound (**6a**)
4. **Figure 4.**  $^1\text{H}$ -NMR Spectrum of compound (**6b**)
5. **Figure 5.**  $^{13}\text{C}$ -NMR Spectrum of compound (**6b**)
6. **Figure 6.** FT-IR Spectrum of compound (**6b**)
7. **Figure 7.**  $^1\text{H}$  -NMR Spectrum of compound (**6c**)
8. **Figure 8.**  $^{13}\text{C}$ -NMR Spectrum of compound (**6c**)
9. **Figure 9.** FT-IR Spectrum of compound (**6c**)
10. **Figure 10.**  $^1\text{H}$  -NMR Spectrum compound (**6d**)
11. **Figure 11.**  $^{13}\text{C}$ -NMR Spectrum compound (**6d**)
12. **Figure 12.** FT-IR Spectrum of compound (**6d**)
13. **Figure 13.**  $^1\text{H}$ -NMR Spectrum of compound (**6e**)
14. **Figure 14.**  $^{13}\text{C}$ -NMR Spectrum of compound (**6e**)
15. **Figure 15.** FT-IR Spectrum of compound (**6e**)
16. **Figure 16.**  $^1\text{H}$ -NMR Spectrum of compound (**6f**)
17. **Figure 17.**  $^{13}\text{C}$ -NMR Spectrum of compound (**6f**)
18. **Figure 18.** FT-IR Spectrum of compound (**6f**)
19. **Figure 19.**  $^1\text{H}$  -NMR Spectrum of compound (**6g**)
20. **Figure 20.**  $^{13}\text{C}$ -NMR Spectrum of compound (**6g**)
21. **Figure 21.** FT-IR Spectrum of compound (**6g**)
22. **Figure 22.**  $^1\text{H}$ -NMR Spectrum of compound (**6h**)
23. **Figure 23.**  $^{13}\text{C}$ -NMR Spectrum of compound (**6h**)
24. **Figure 24.** FT-IR Spectrum of compound (**6h**)

**25. Figure 25.** FT-IR Spectrum of compound **(6i)**

**26. Figure 26.** FT-IR Spectrum of compound **(6j)**

**27. Figure 27.** 3D docking pose and 2D binding interactions of compounds **(6a-j)** in the binding pocket of  $\alpha$ -amylase

**28. Fig 28.** 3D docking pose and 2D binding interactions of compounds **(6a-j)** in the binding pocket of proteinase K

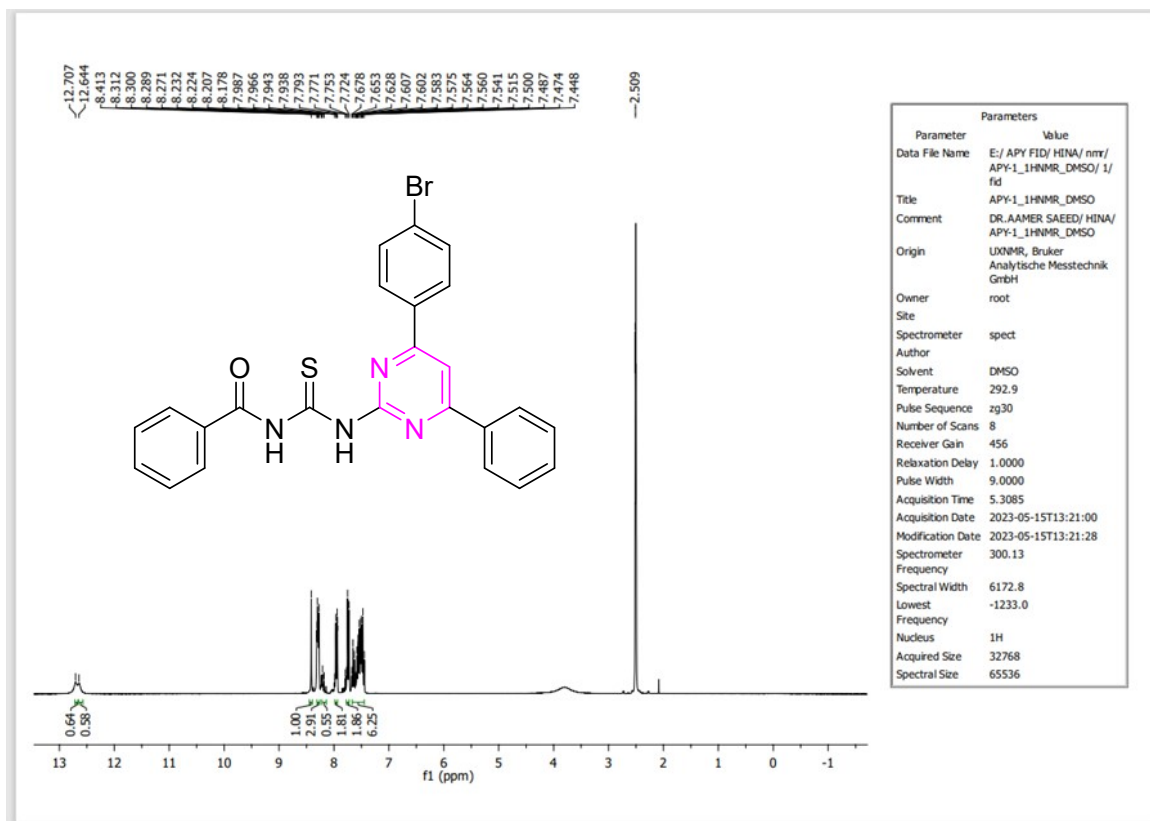

Figure 1. <sup>1</sup>H-NMR Spectrum of compound (6a)

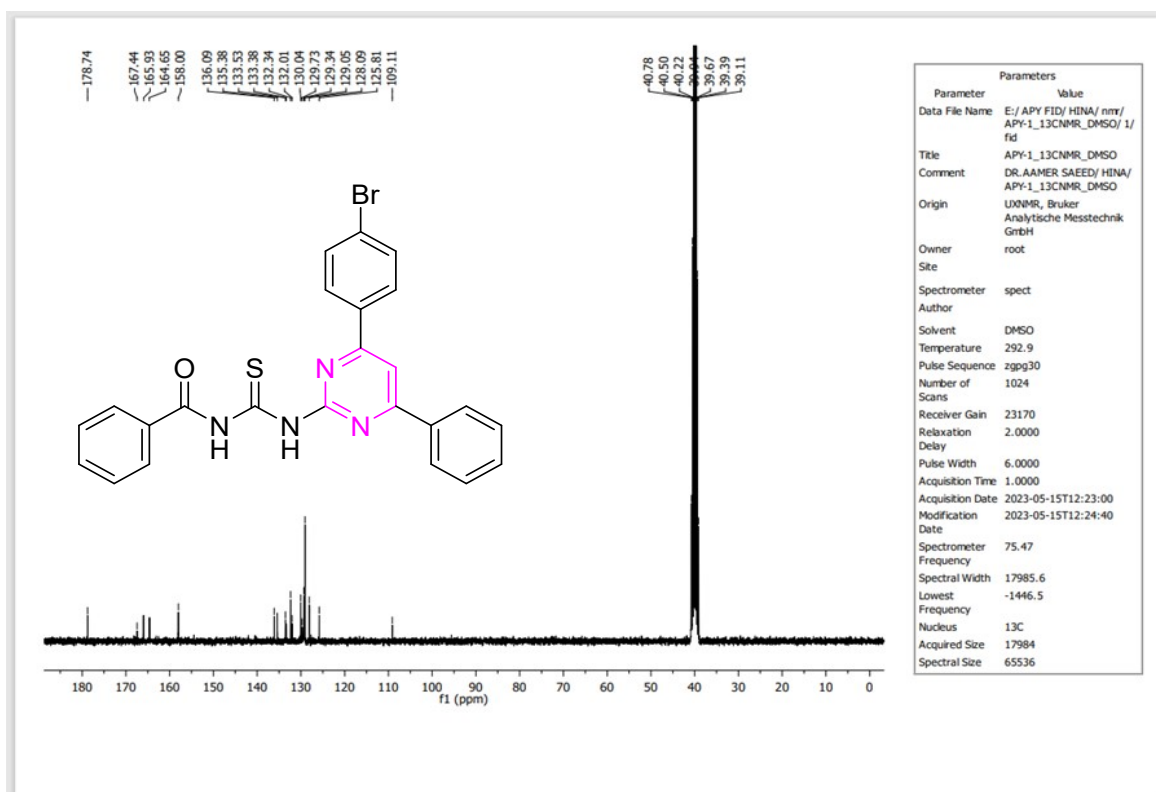

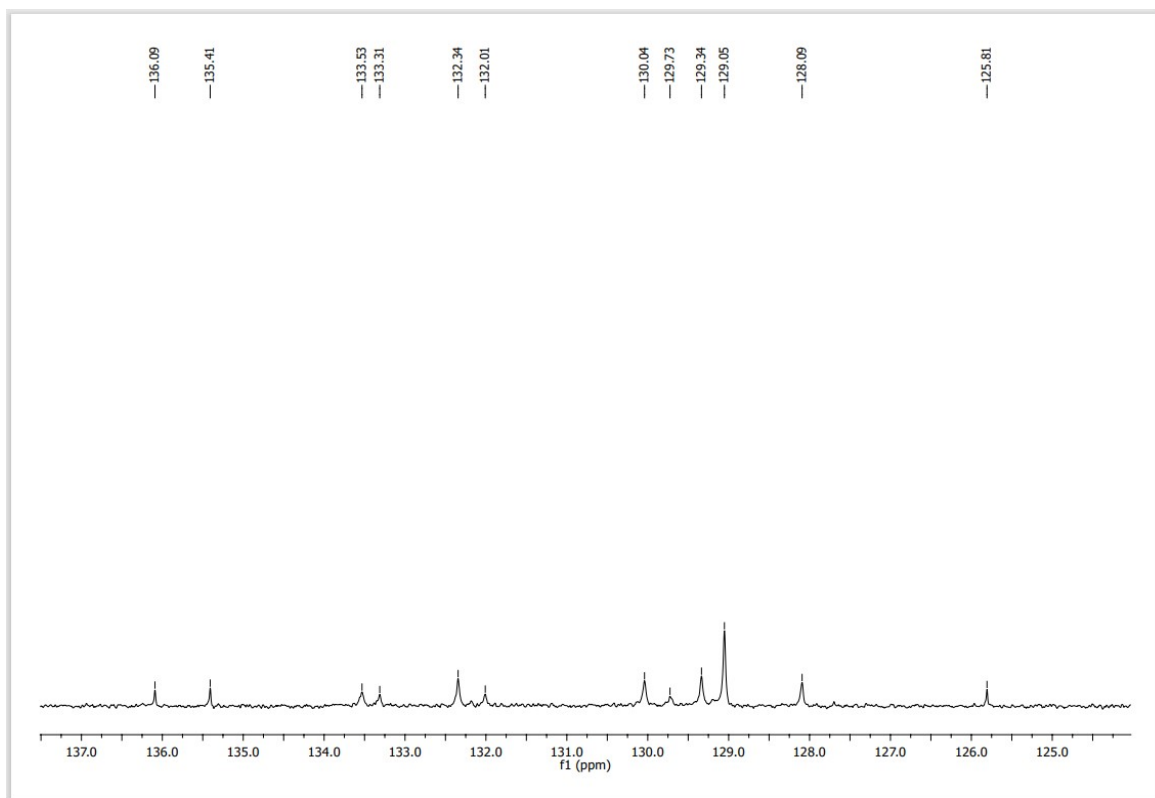

**Figure 2.**  $^{13}\text{C}$ -NMR Spectrum of compound (6a)

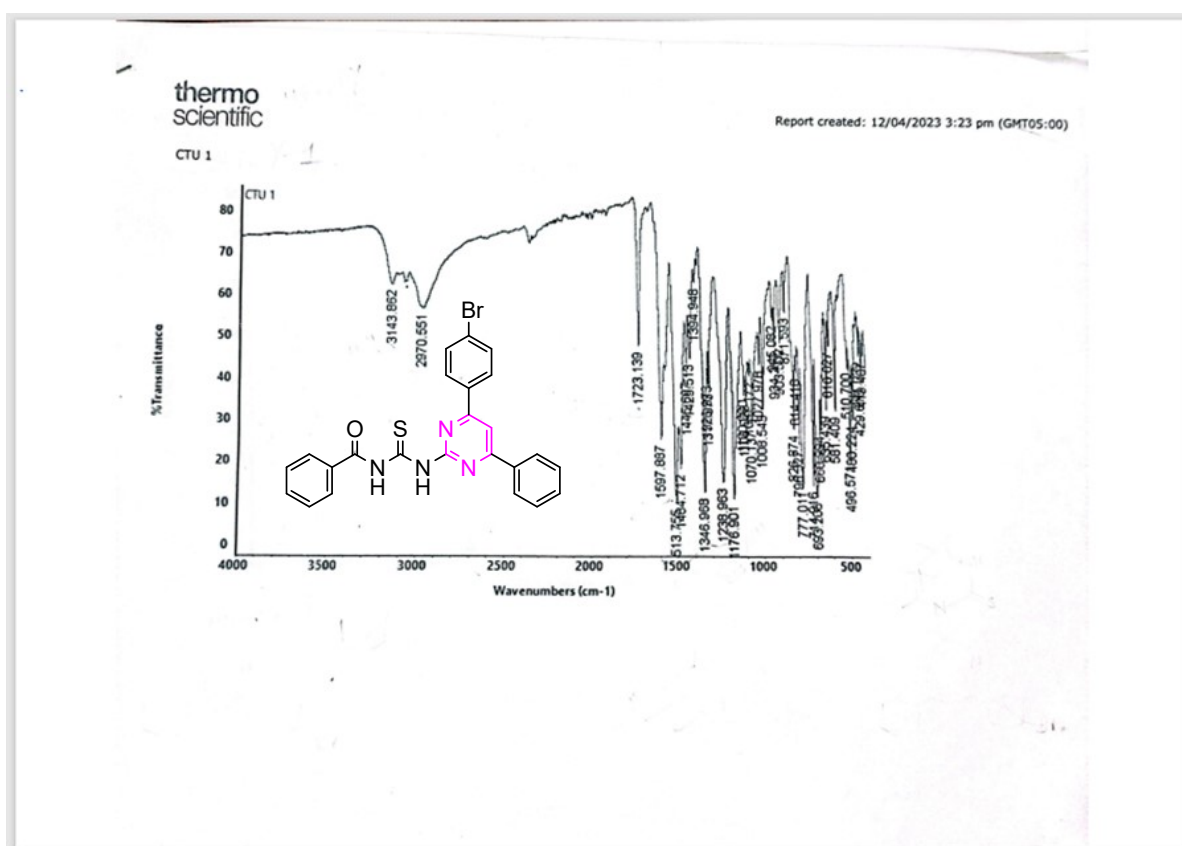

**Figure 3.** FT-IR Spectrum of compound (6a)

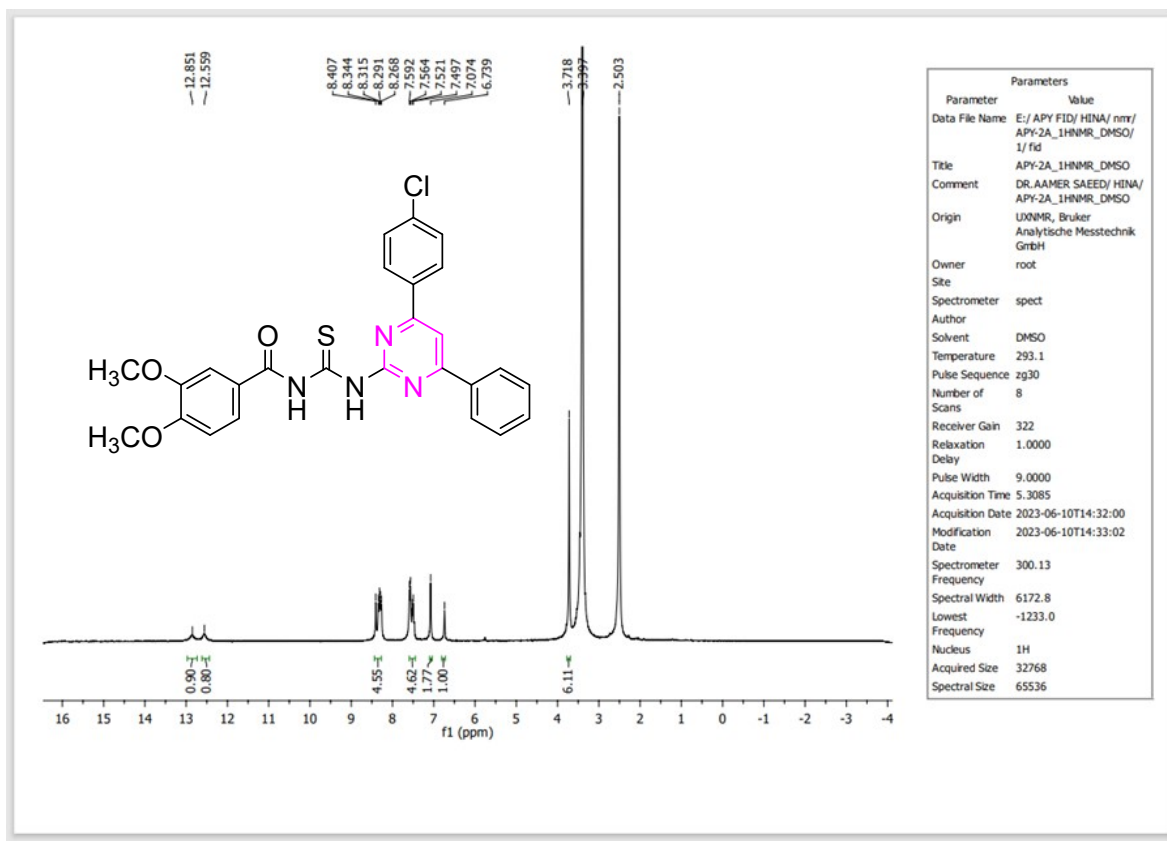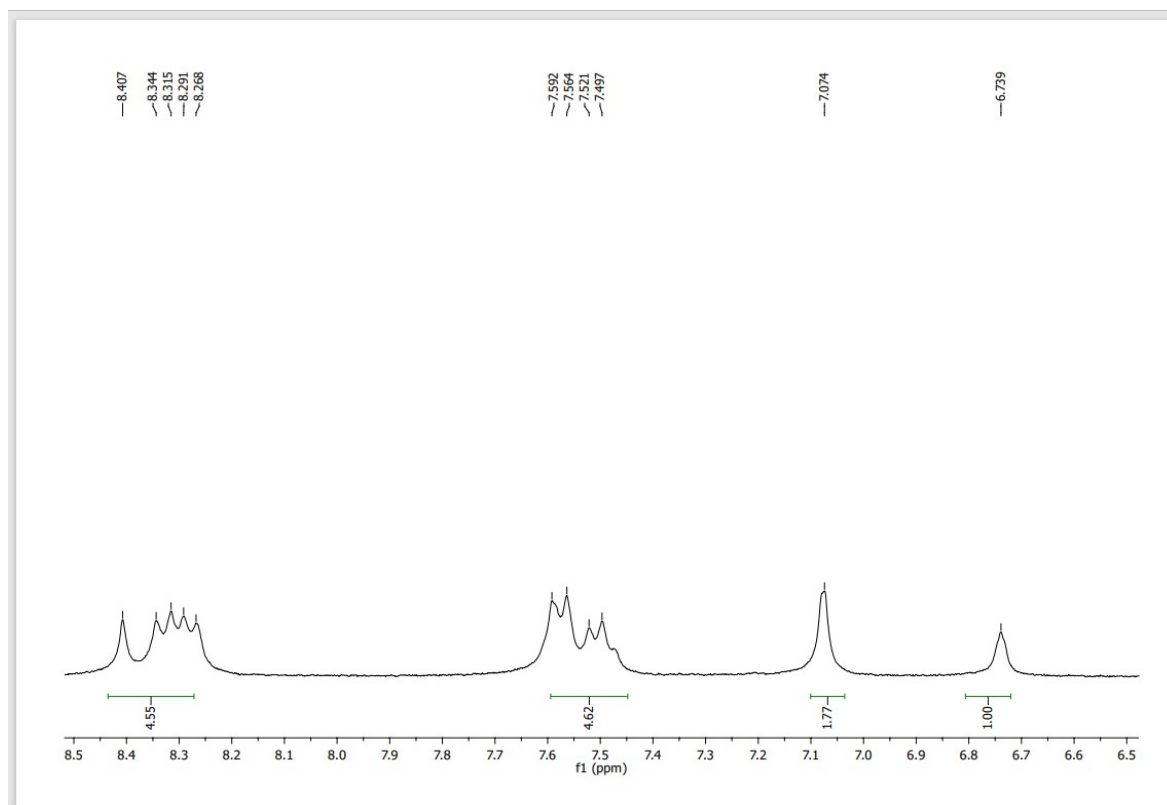

**Figure 4.** <sup>1</sup>H-NMR Spectrum of compound (6b)

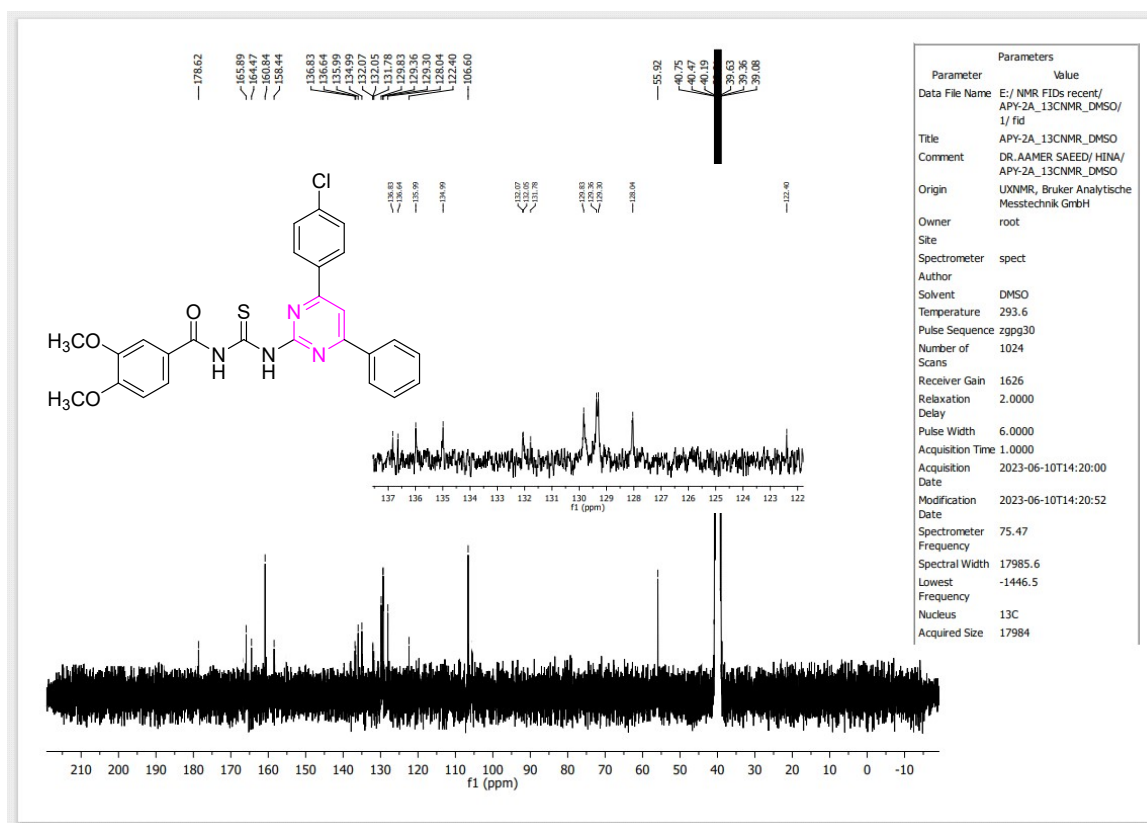

Figure 5. <sup>13</sup>C-NMR Spectrum of compound (6b)

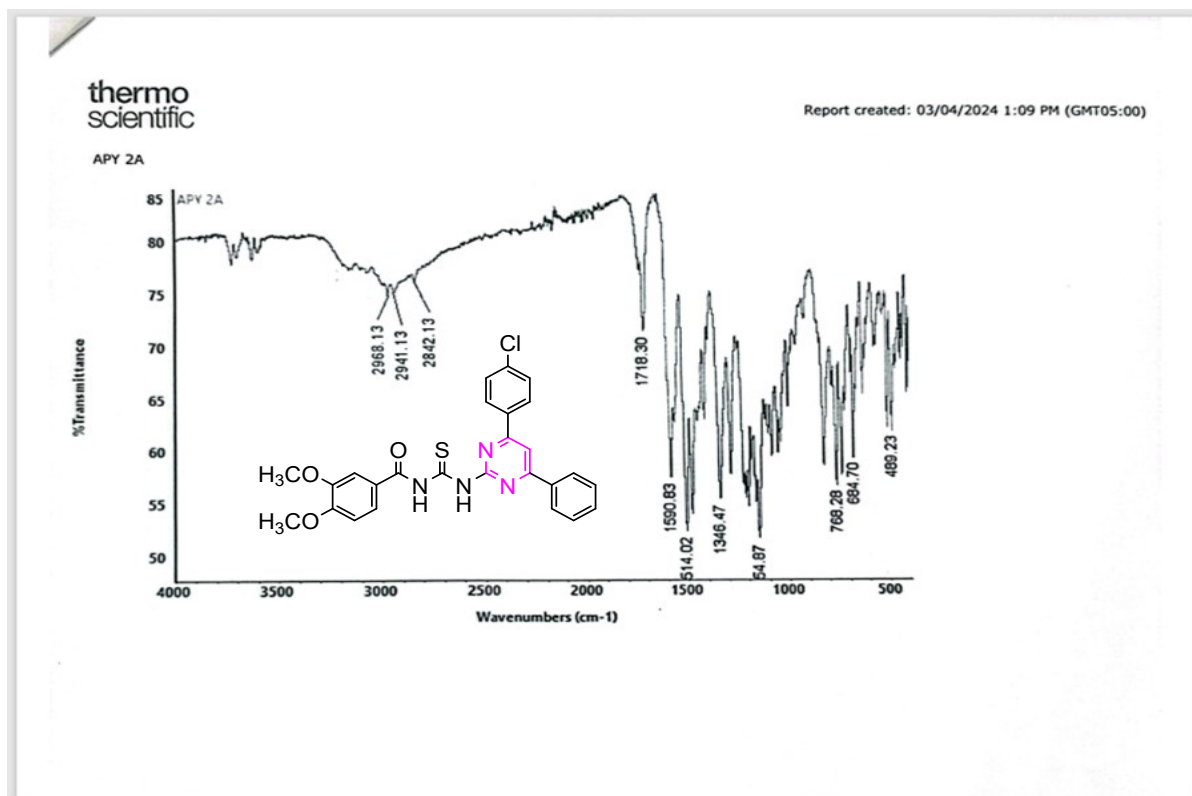

Figure 6. FT-IR Spectrum of compound (6b)

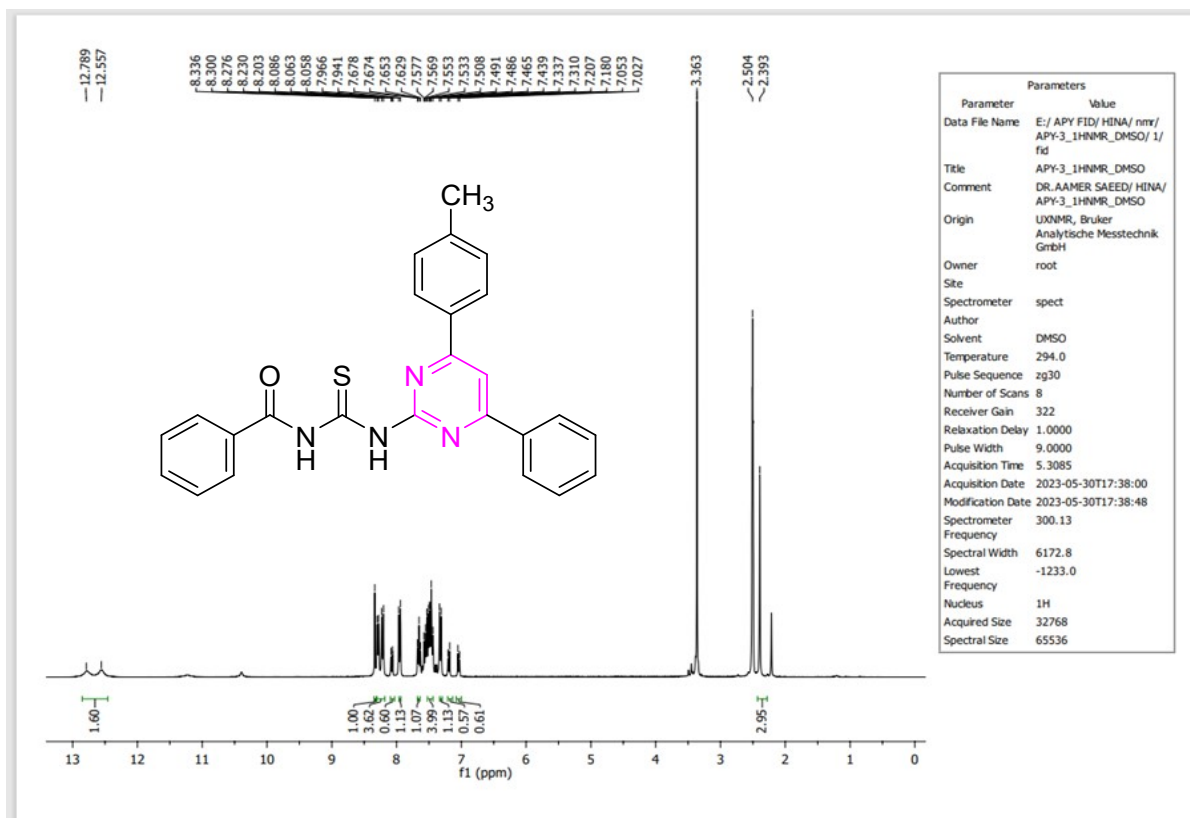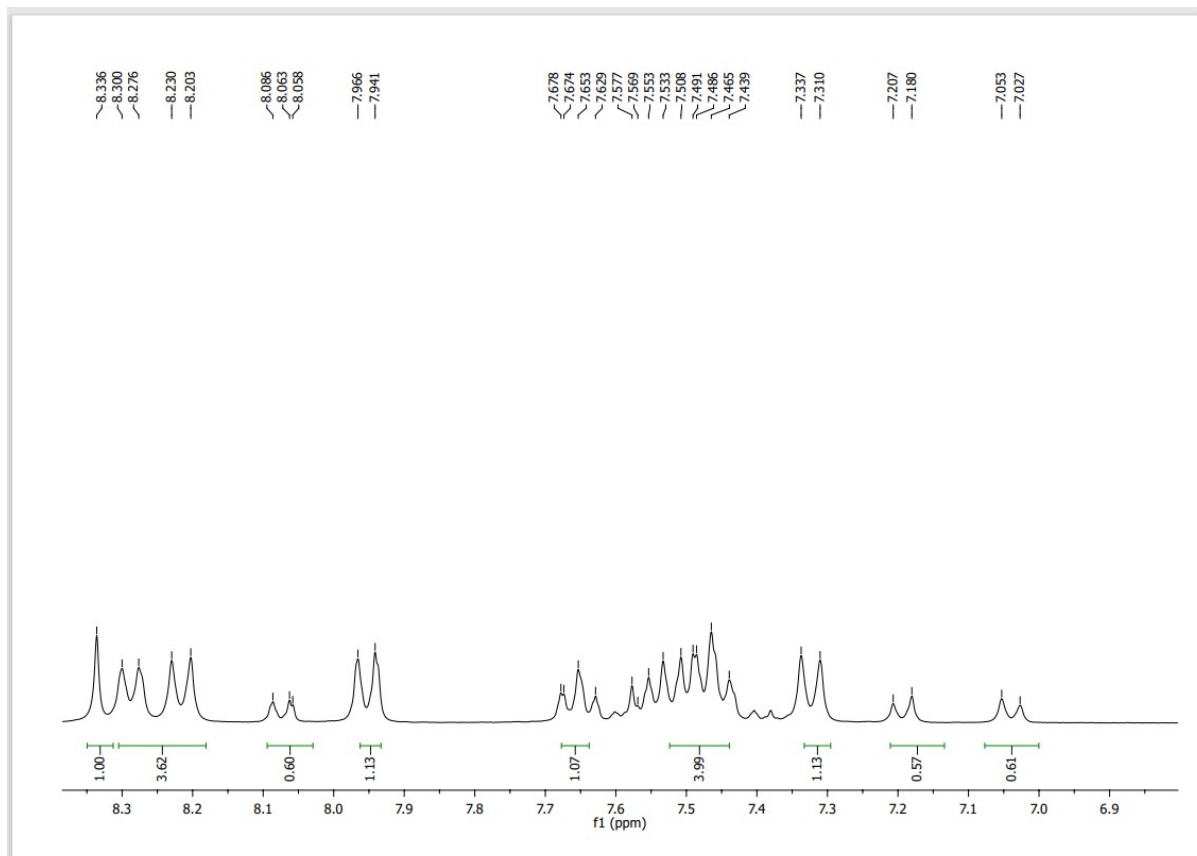



Figure 7. <sup>1</sup>H-NMR Spectrum of compound (6c)

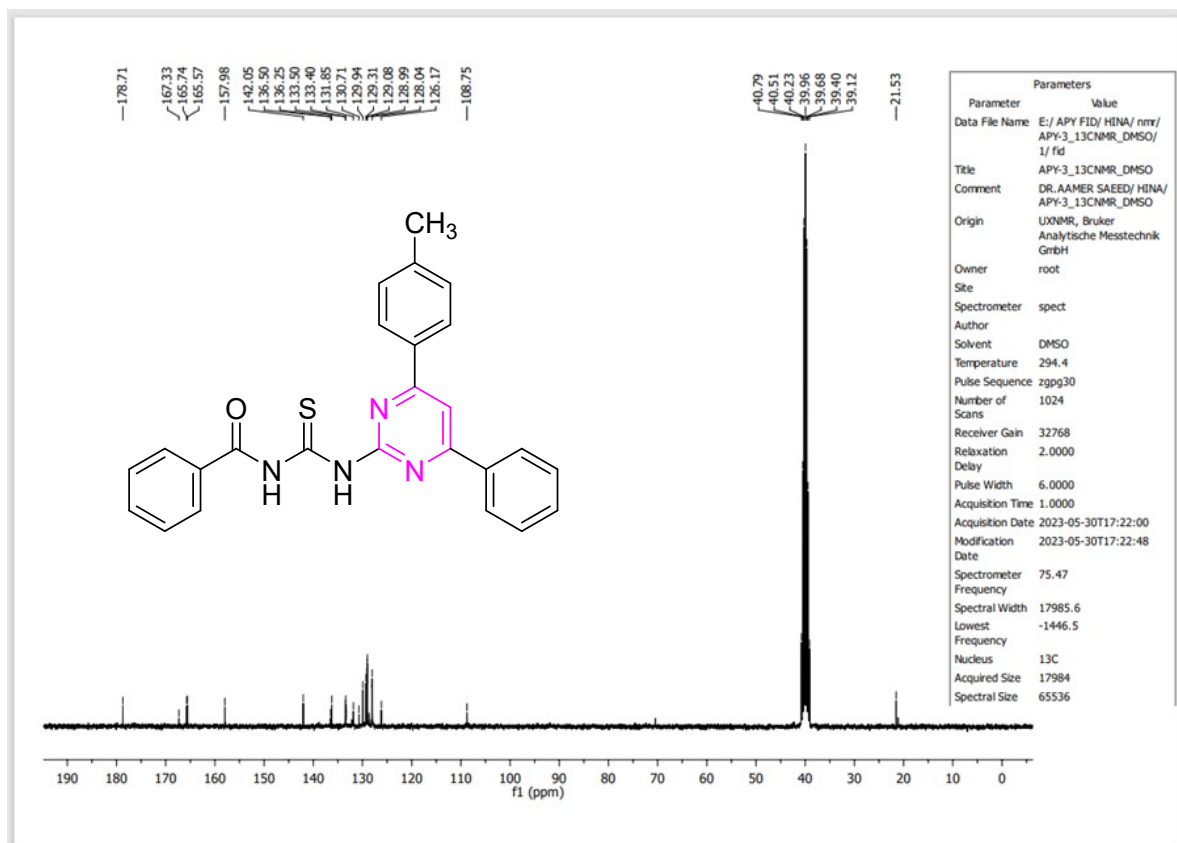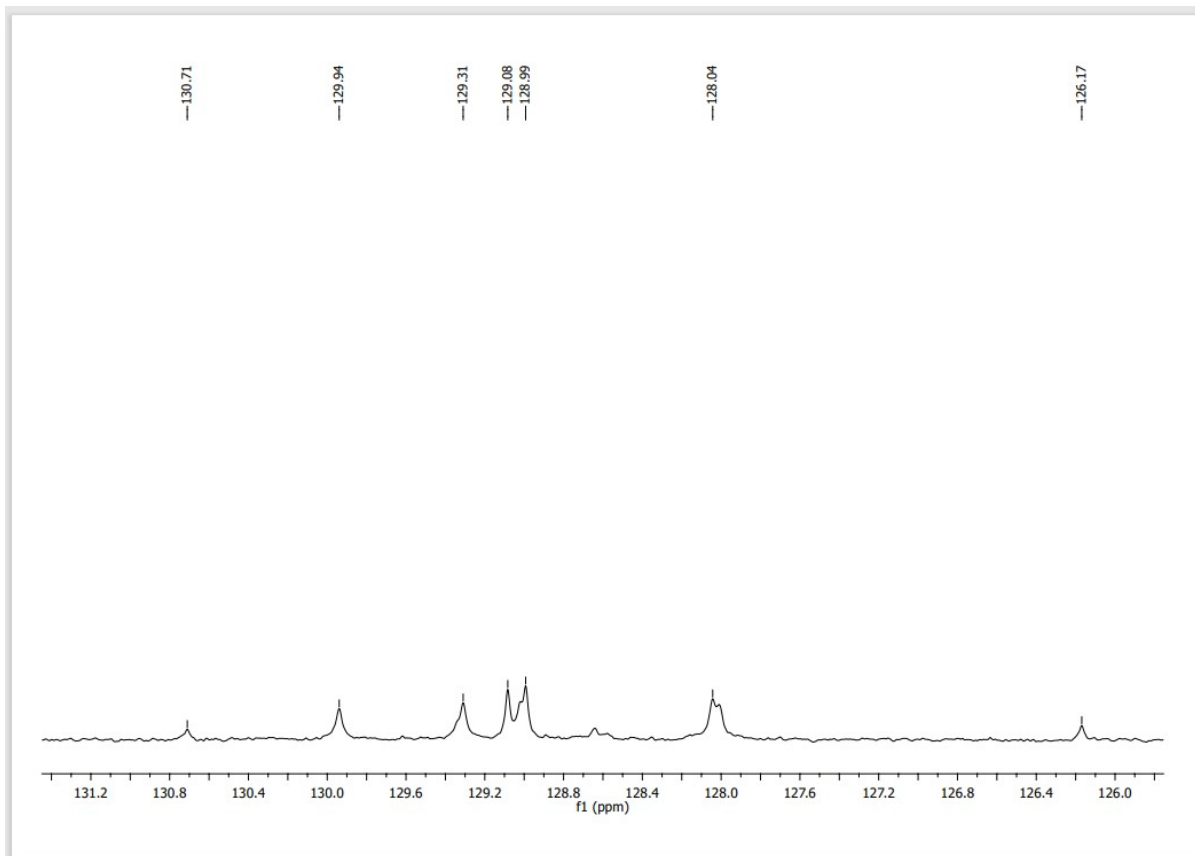

**Figure 8.**  $^{13}\text{C}$ -NMR Spectrum of compound (**6c**)

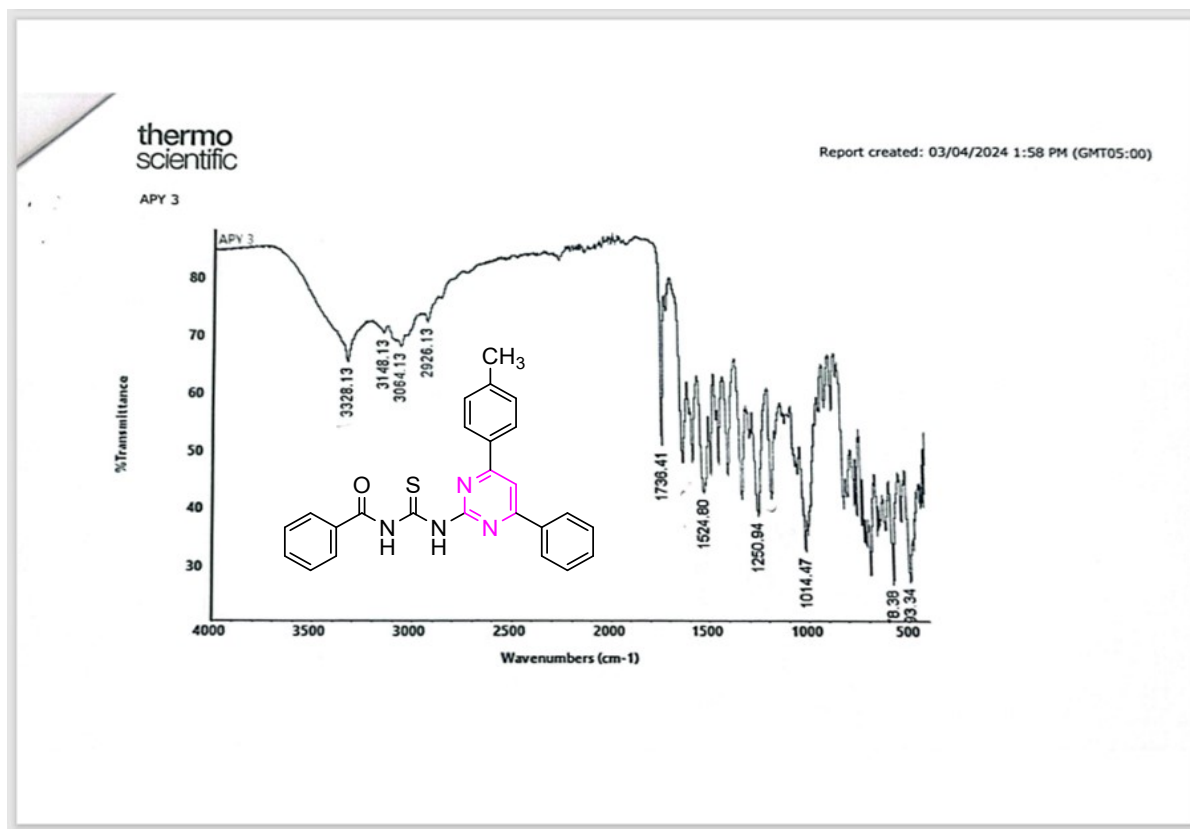

**Figure 9.** FT-IR Spectrum of compound (**6c**)

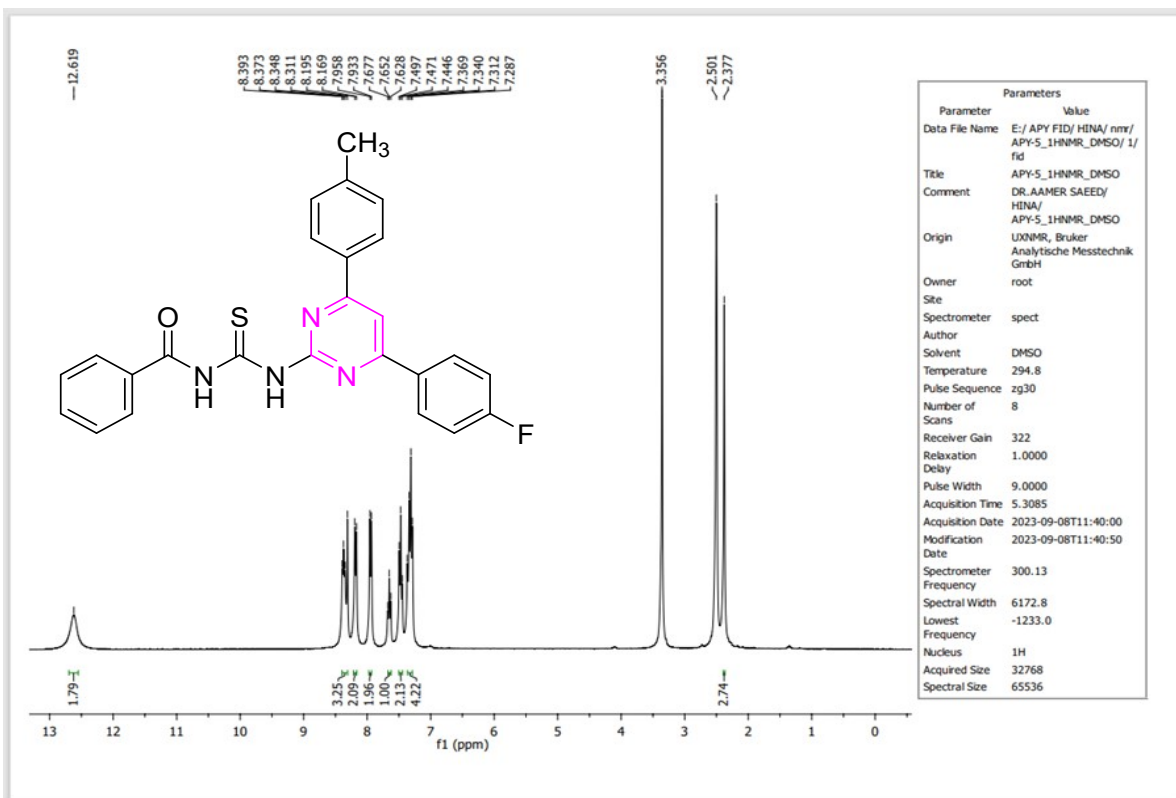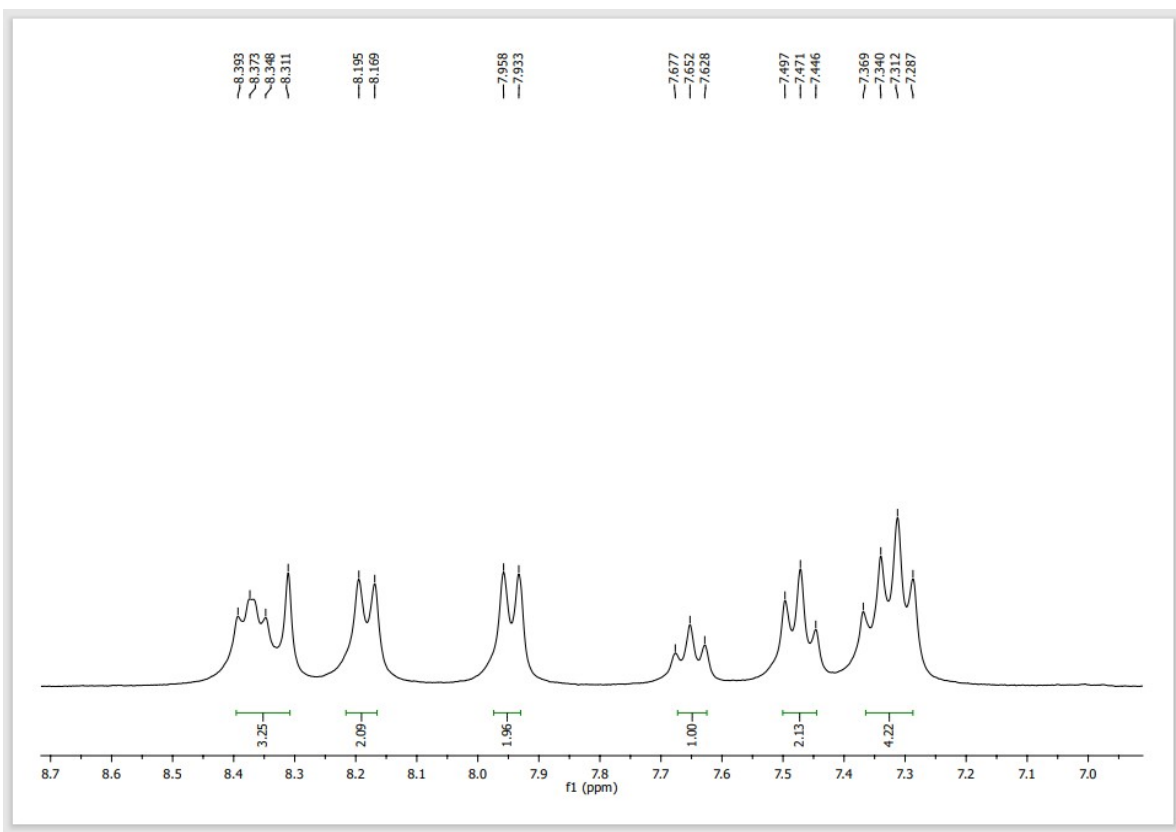

Figure 10. <sup>1</sup>H-NMR Spectrum of compound (6d)

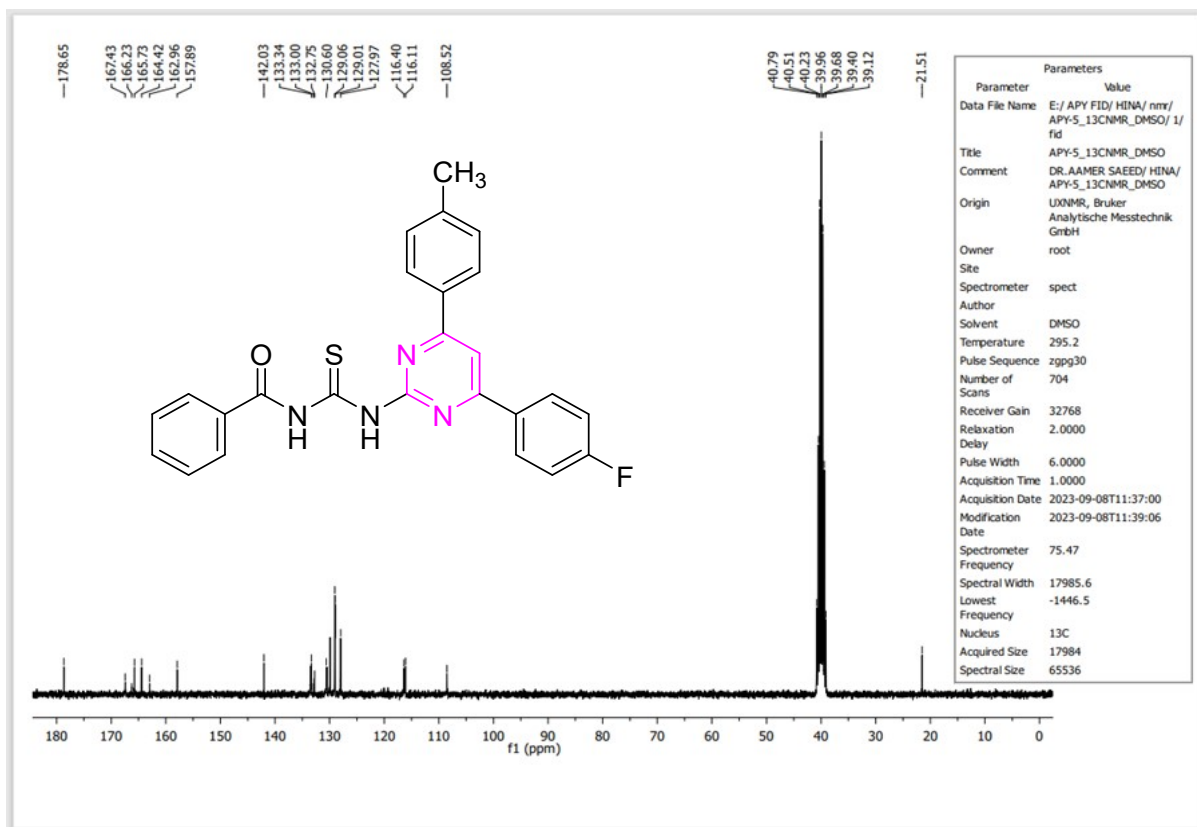

Figure 11. <sup>13</sup>C-NMR Spectrum of compound (6d)

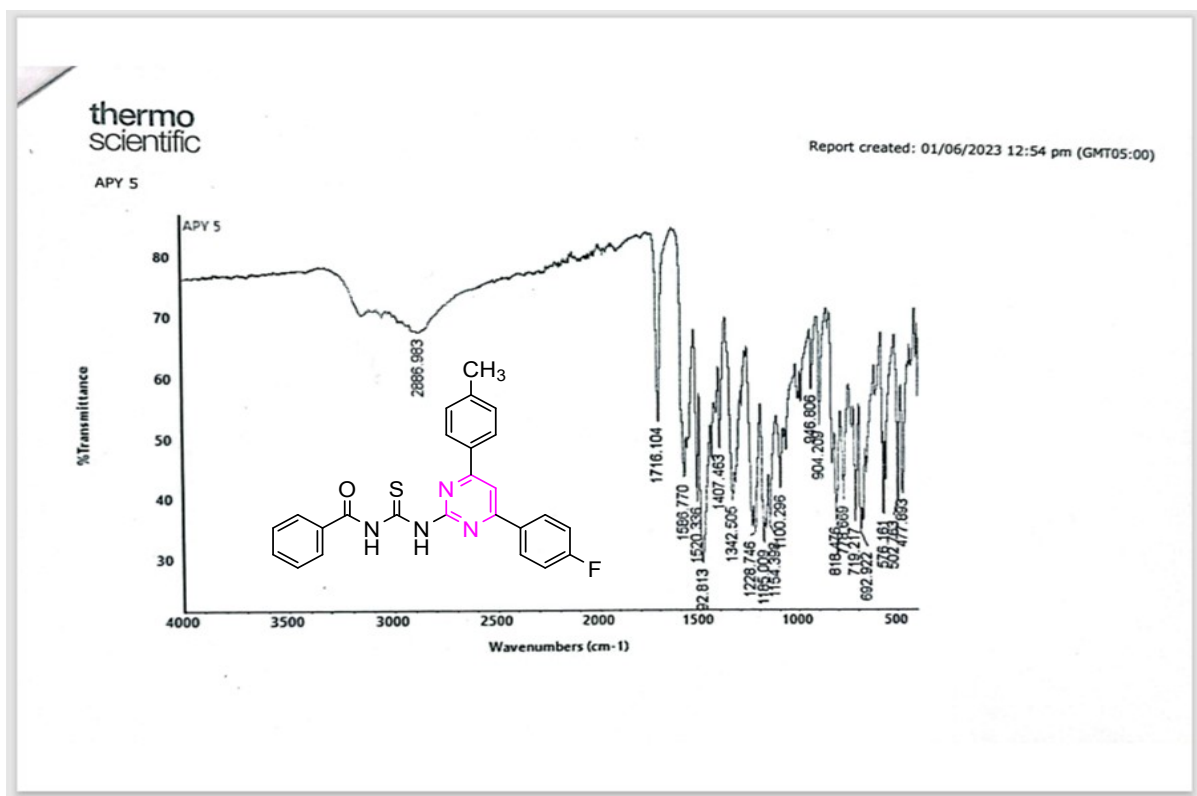

Figure 12. FT-IR Spectrum of compound (6d)

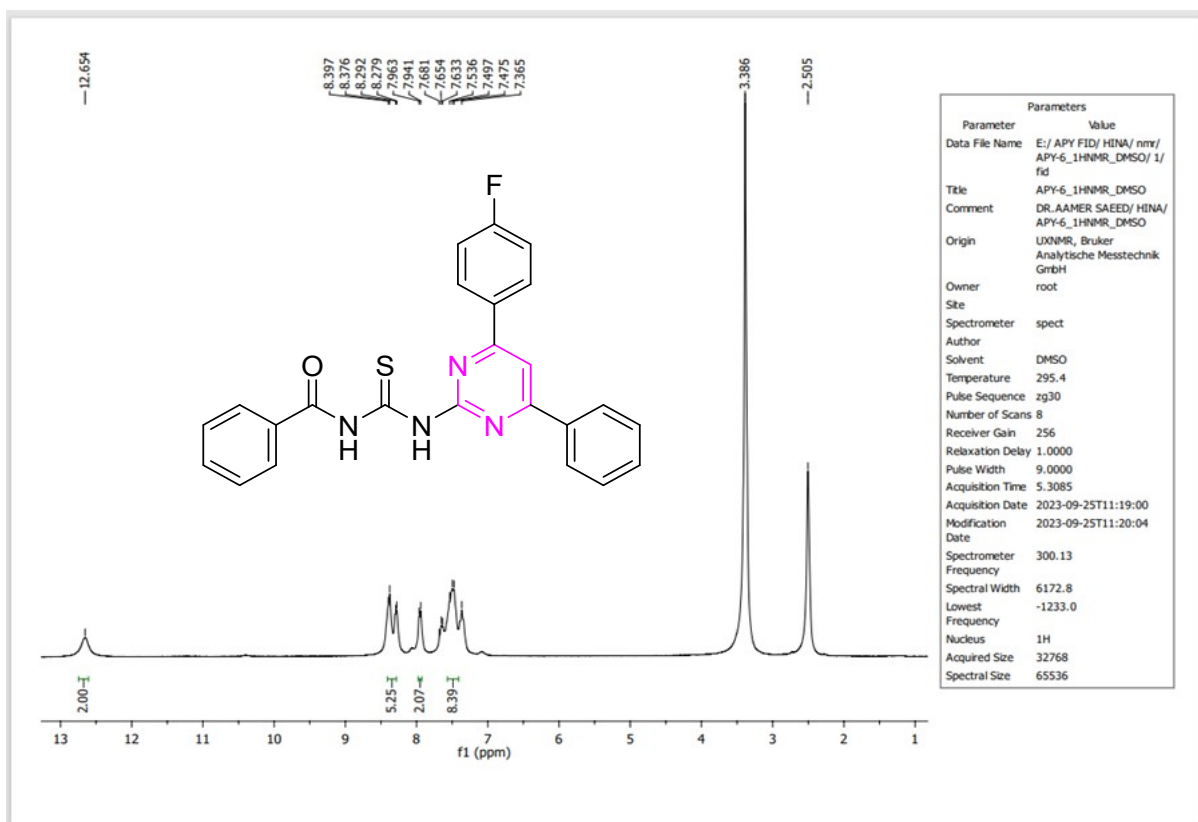

Figure 13. <sup>1</sup>H-NMR Spectrum of compound (6e)

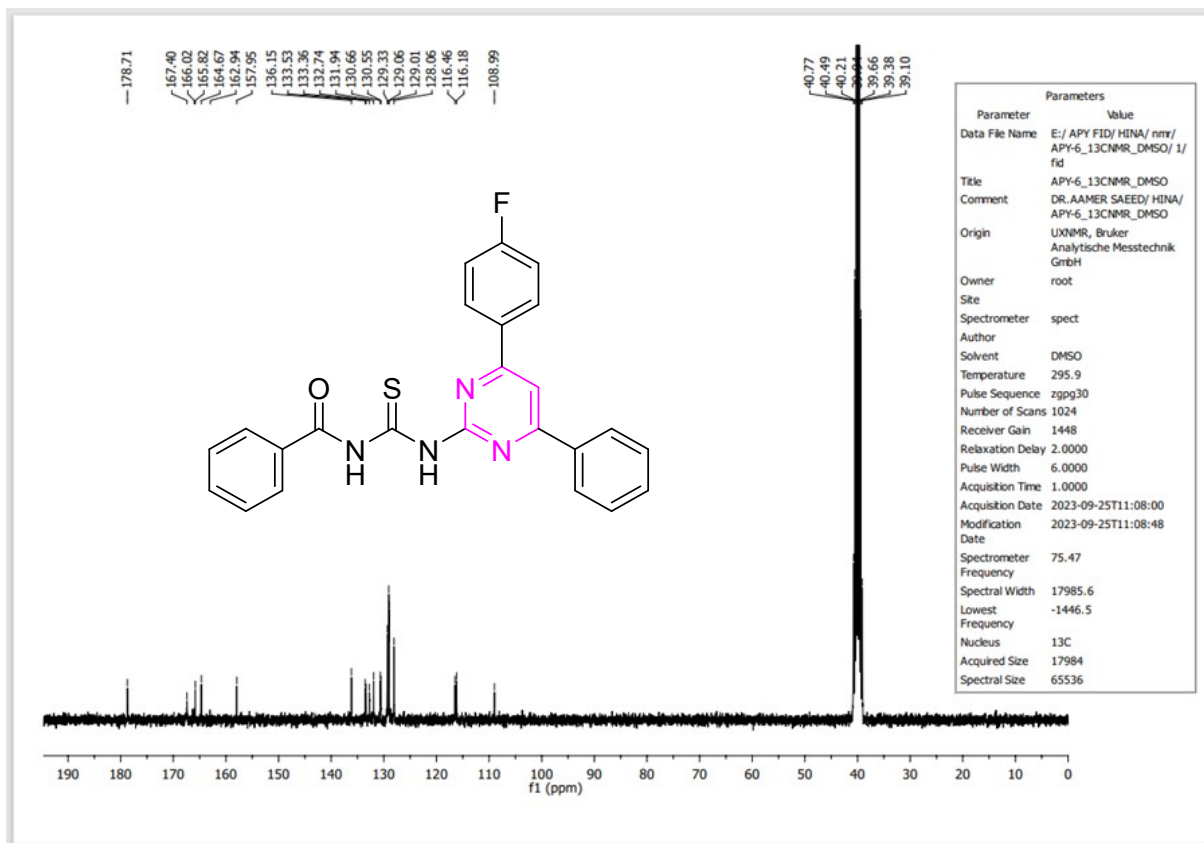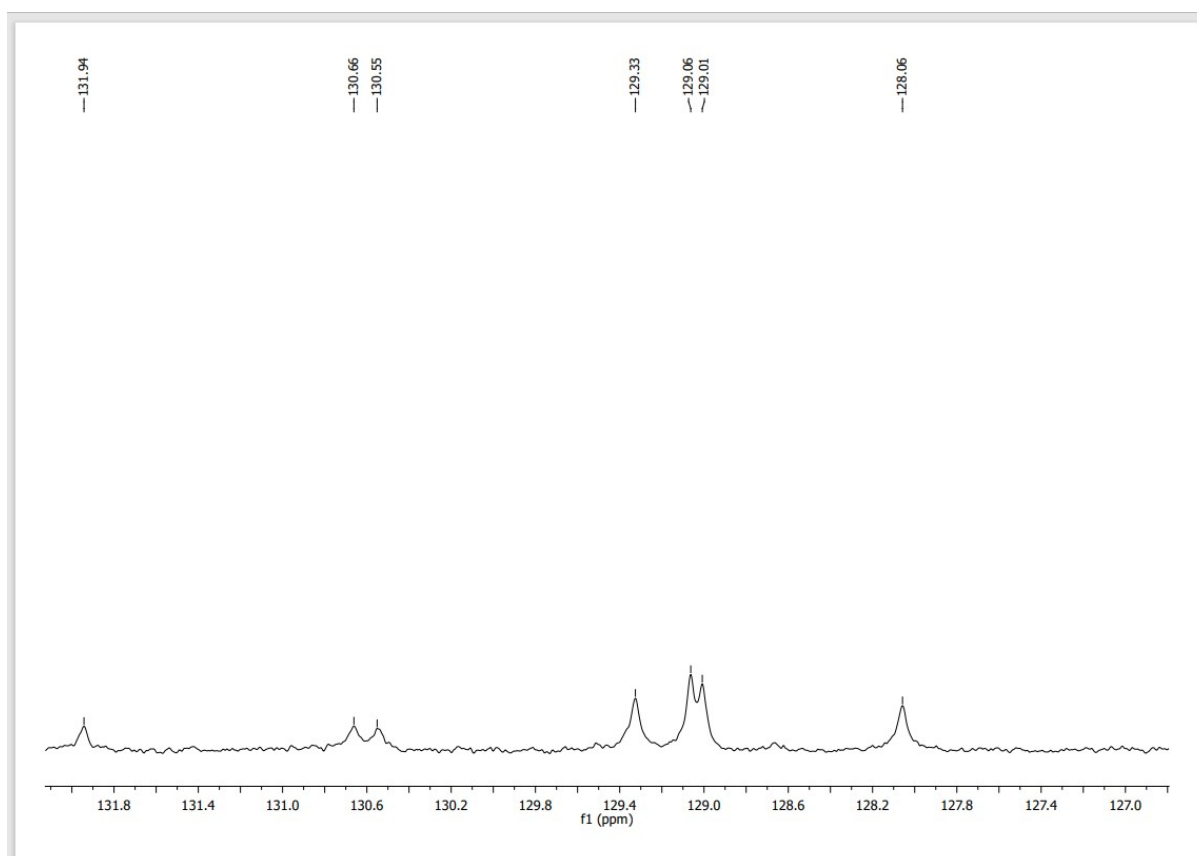

Figure 14.  $^{13}\text{C}$ -NMR Spectrum of compound (6e)

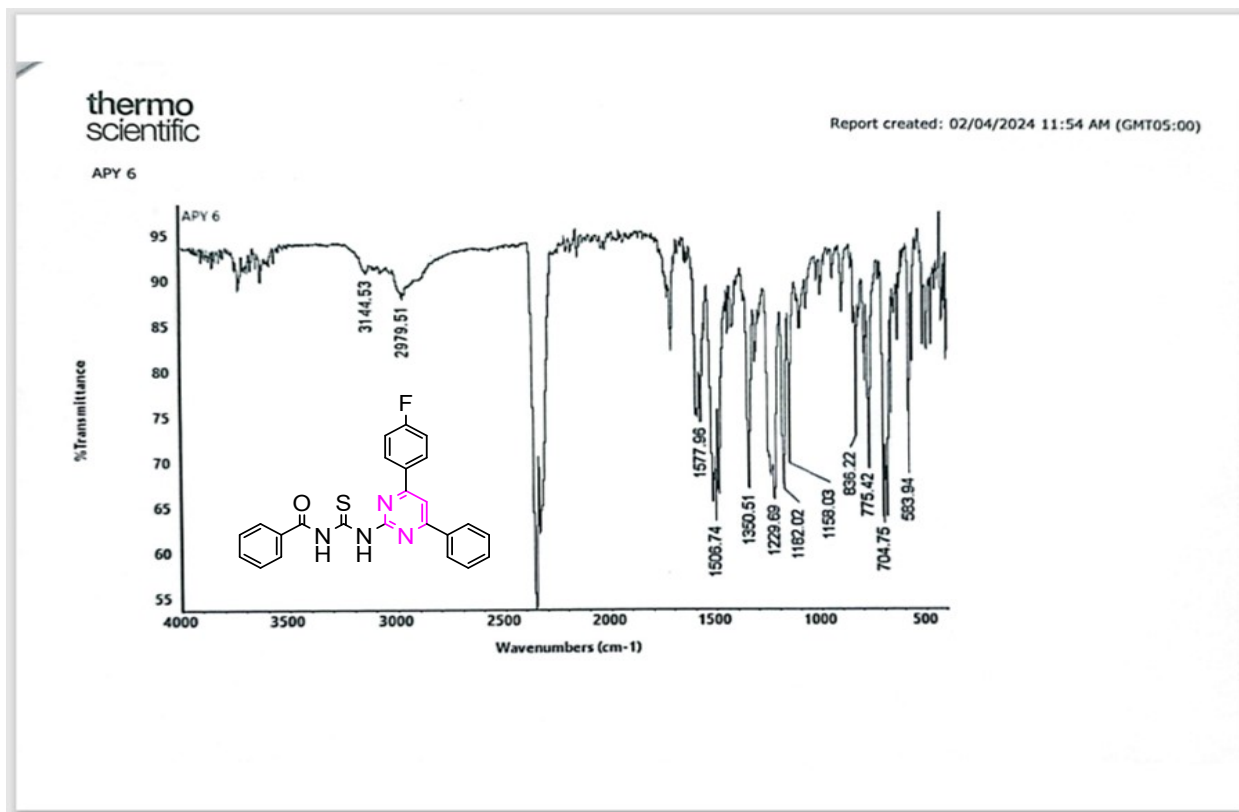

Figure 15. FT-IR Spectrum of compound (6e)

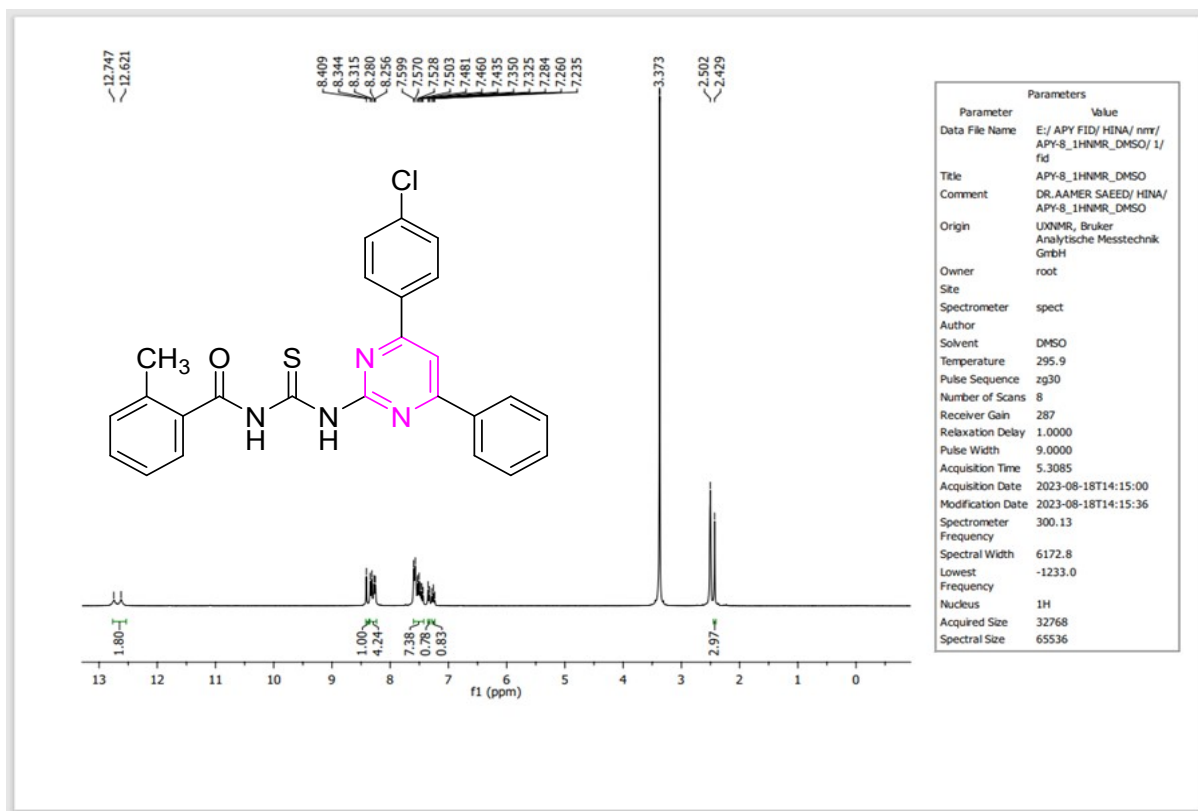

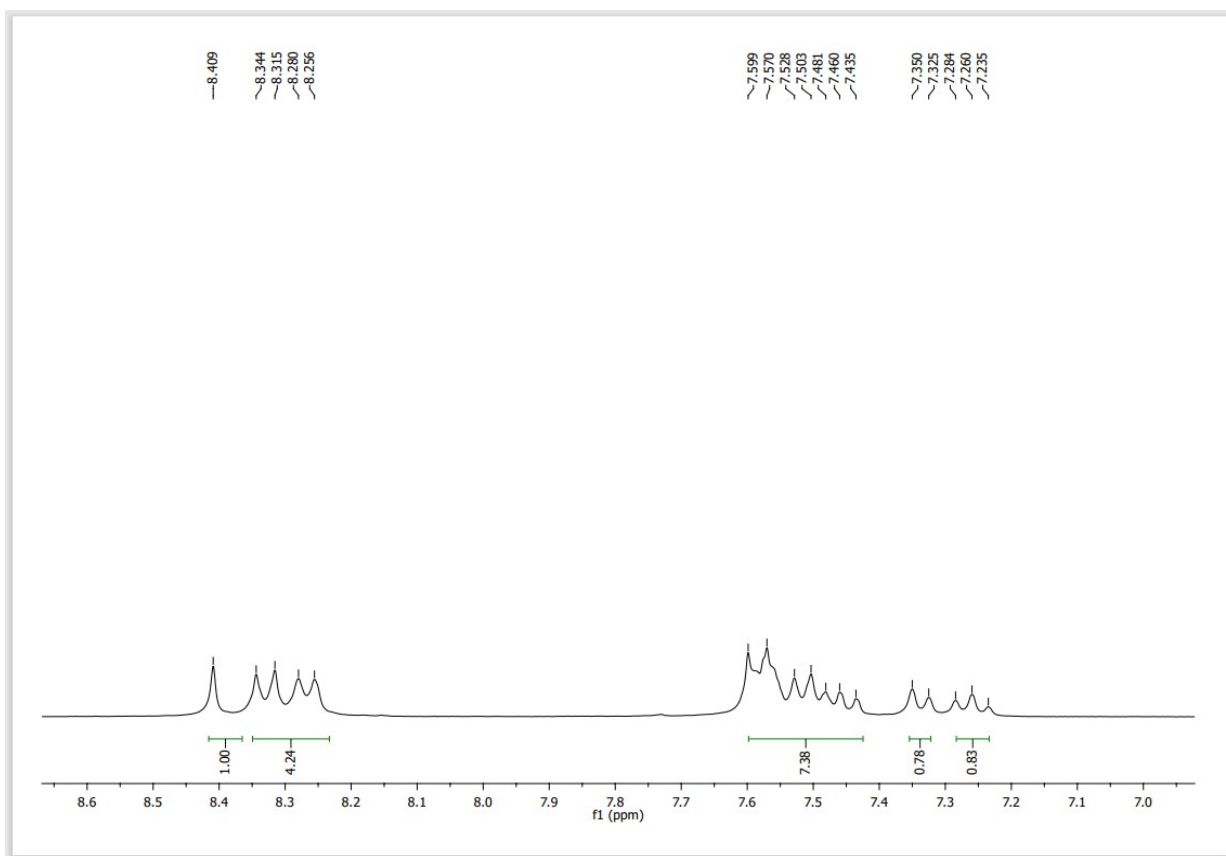

**Figure 16.** <sup>1</sup>H-NMR Spectrum of compound (6f)



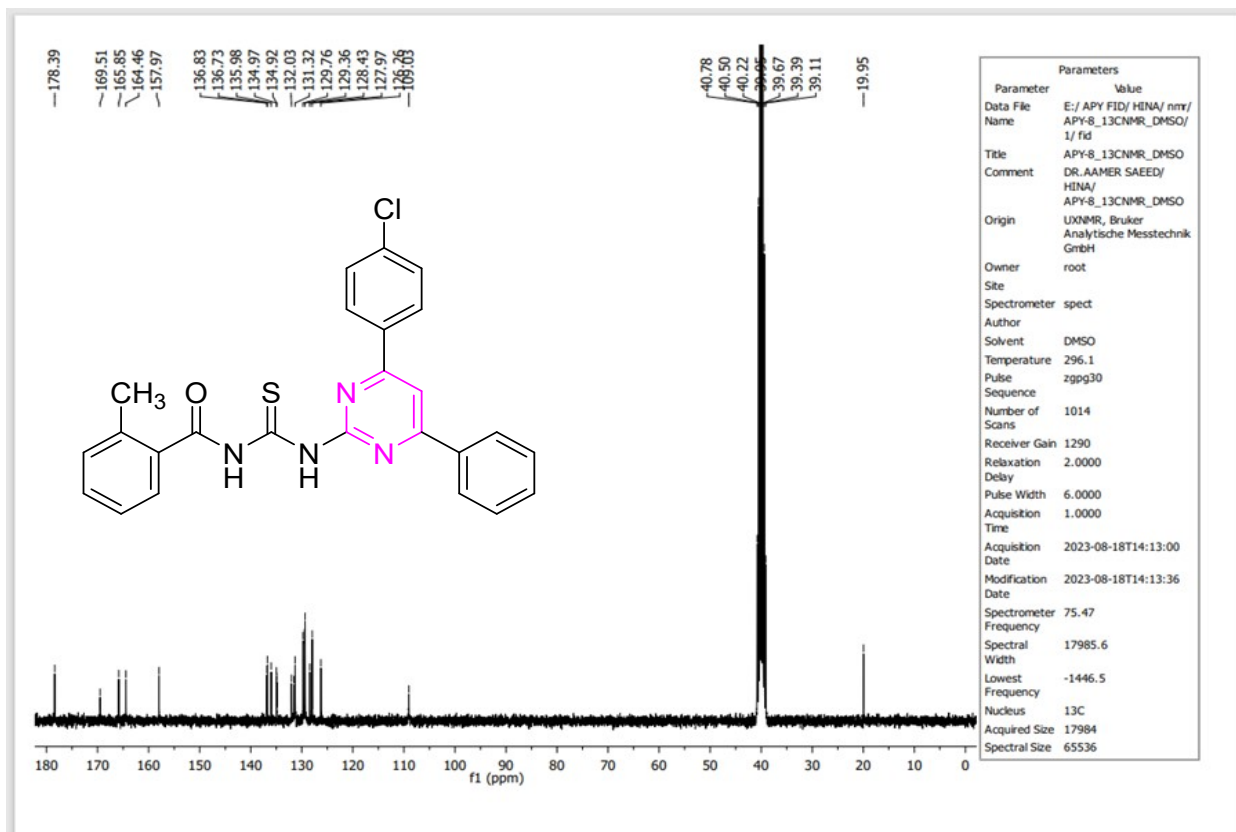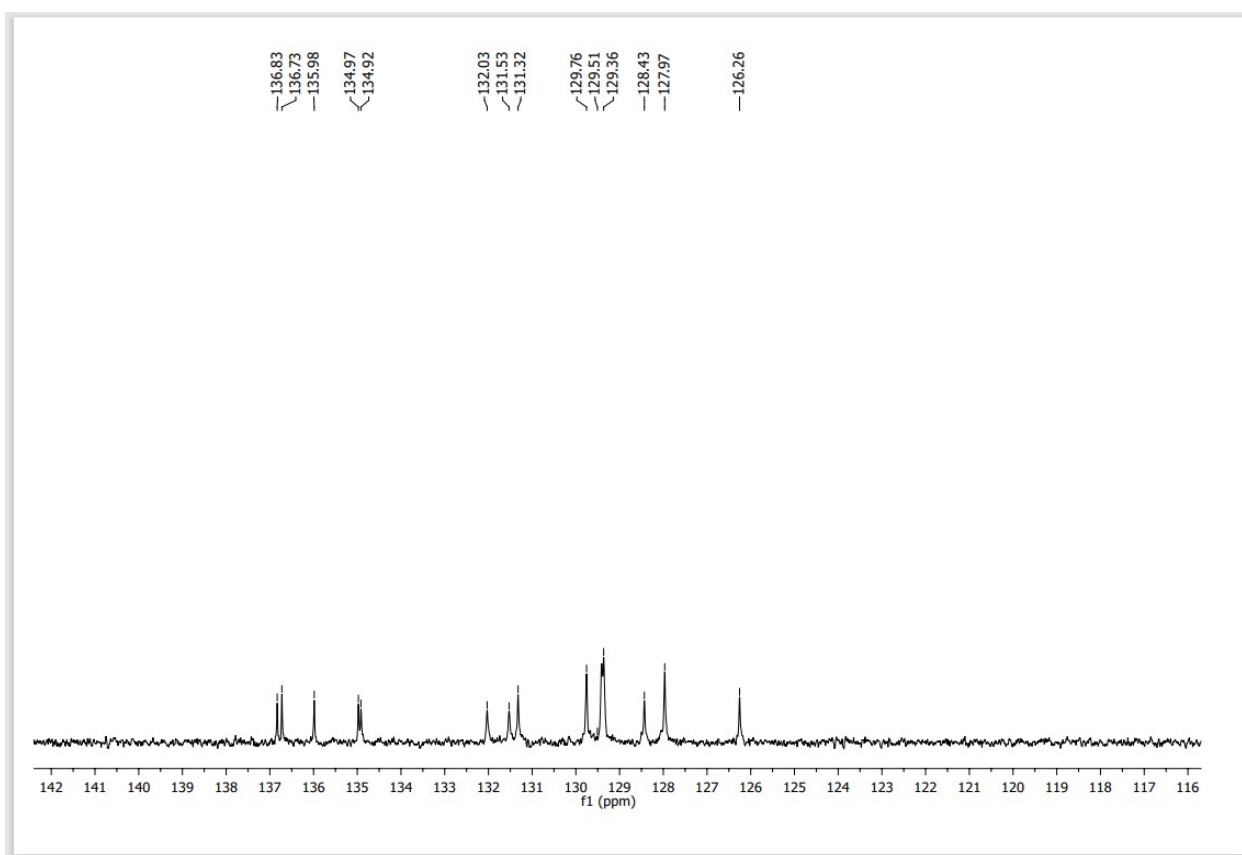

Figure 17. <sup>13</sup>C-NMR Spectrum of compound (6f)

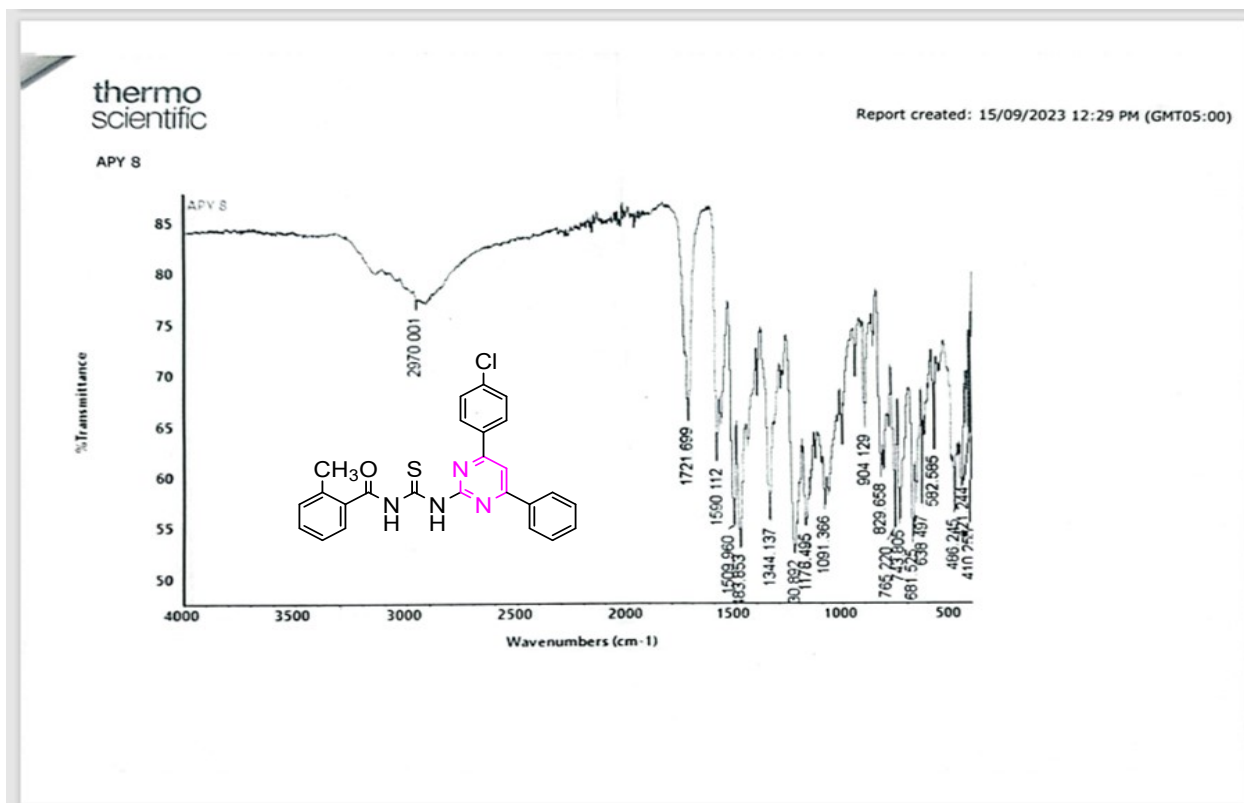

Figure 18. FT-IR Spectrum of compound (6f)

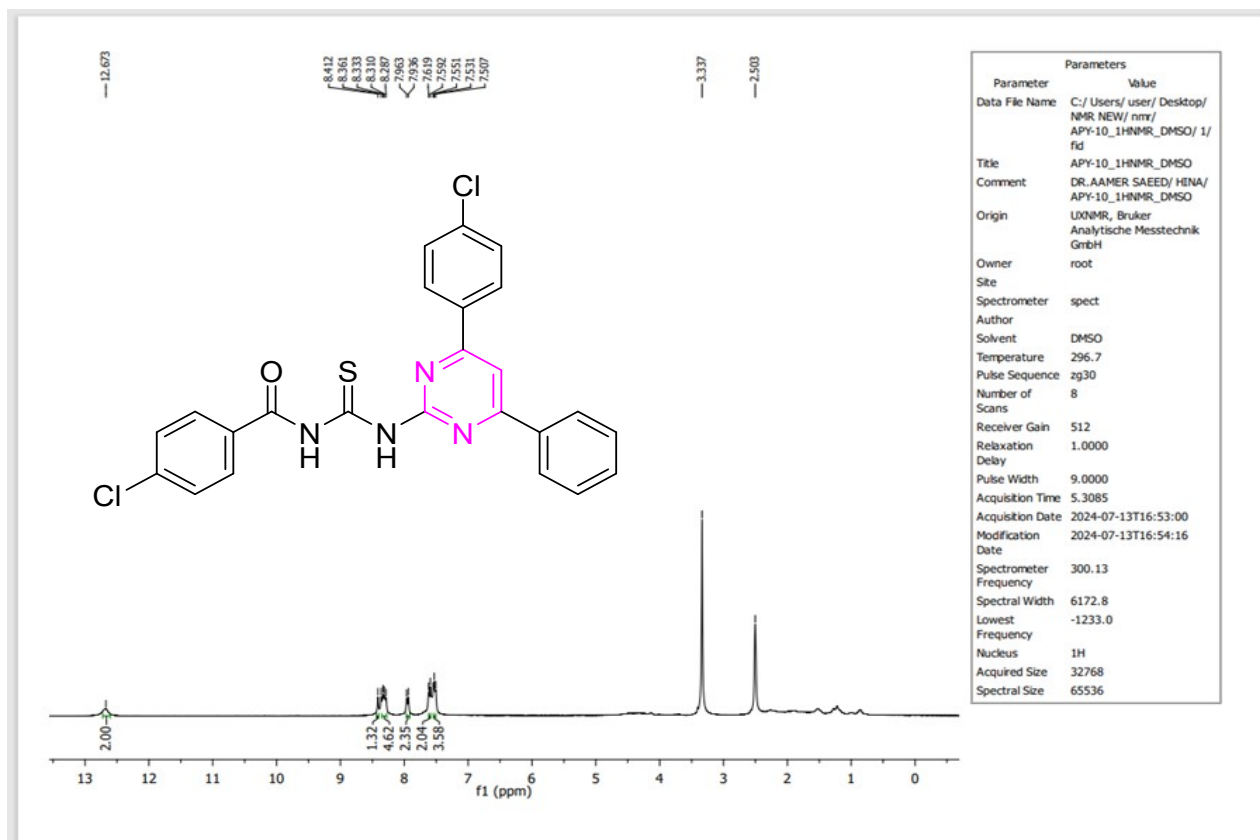

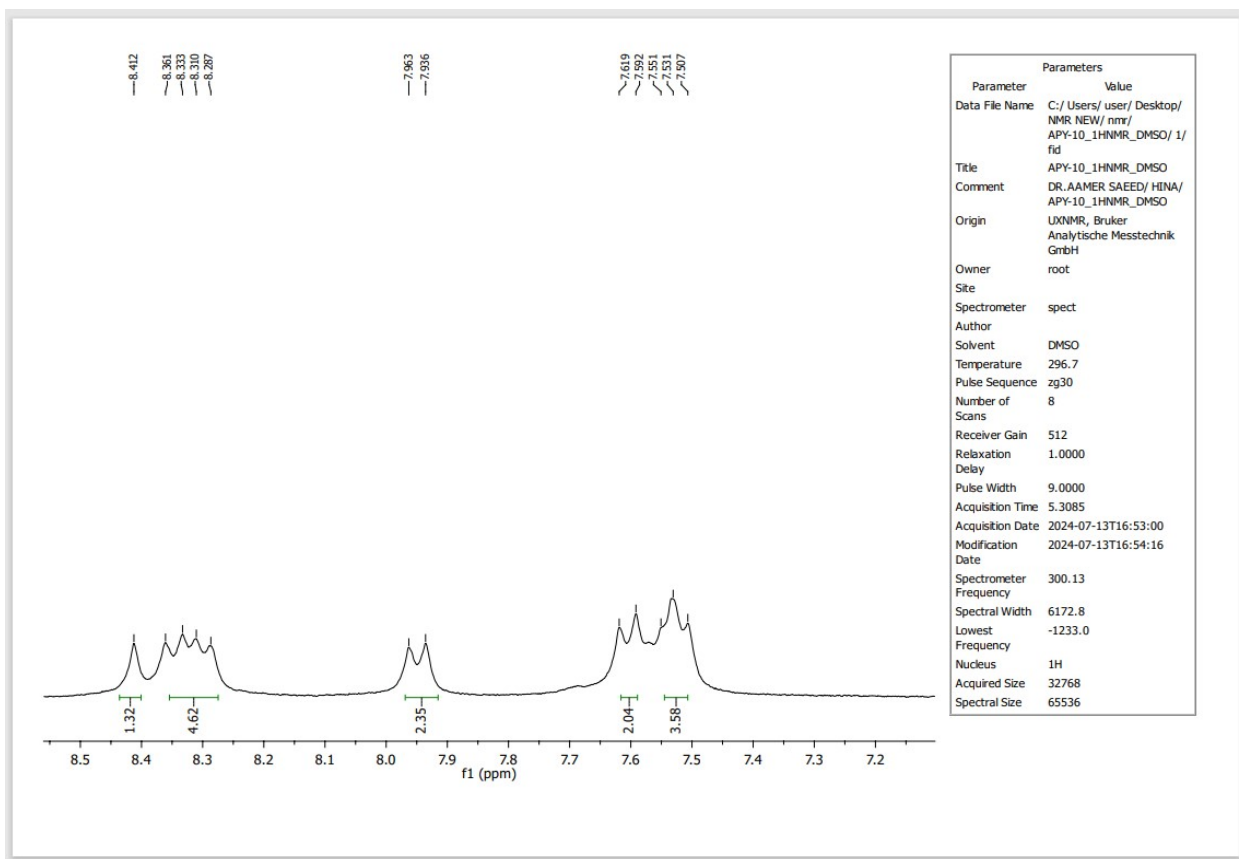

Figure 19. <sup>1</sup>H-NMR Spectrum of compound (6g)

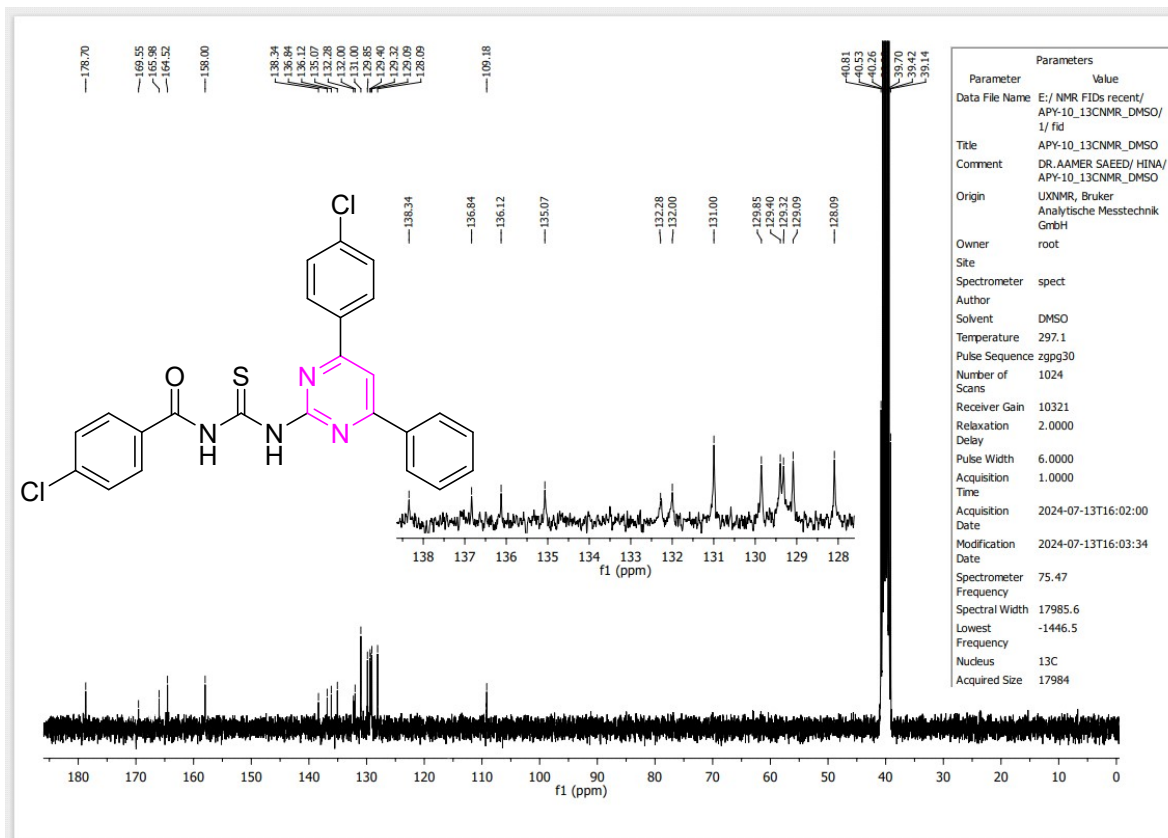

Figure 20.  $^{13}\text{C}$ -NMR Spectrum of compound (6g)

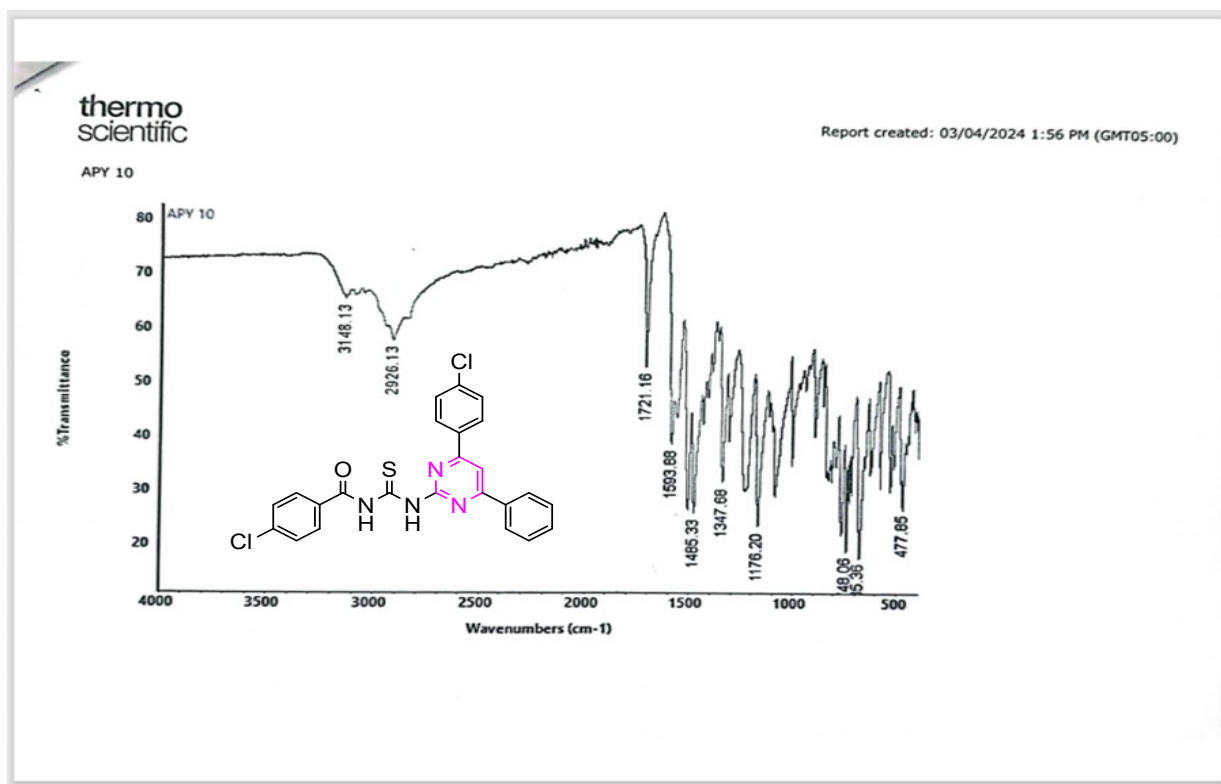

Figure 21. FT-IR Spectrum of compound (6g)

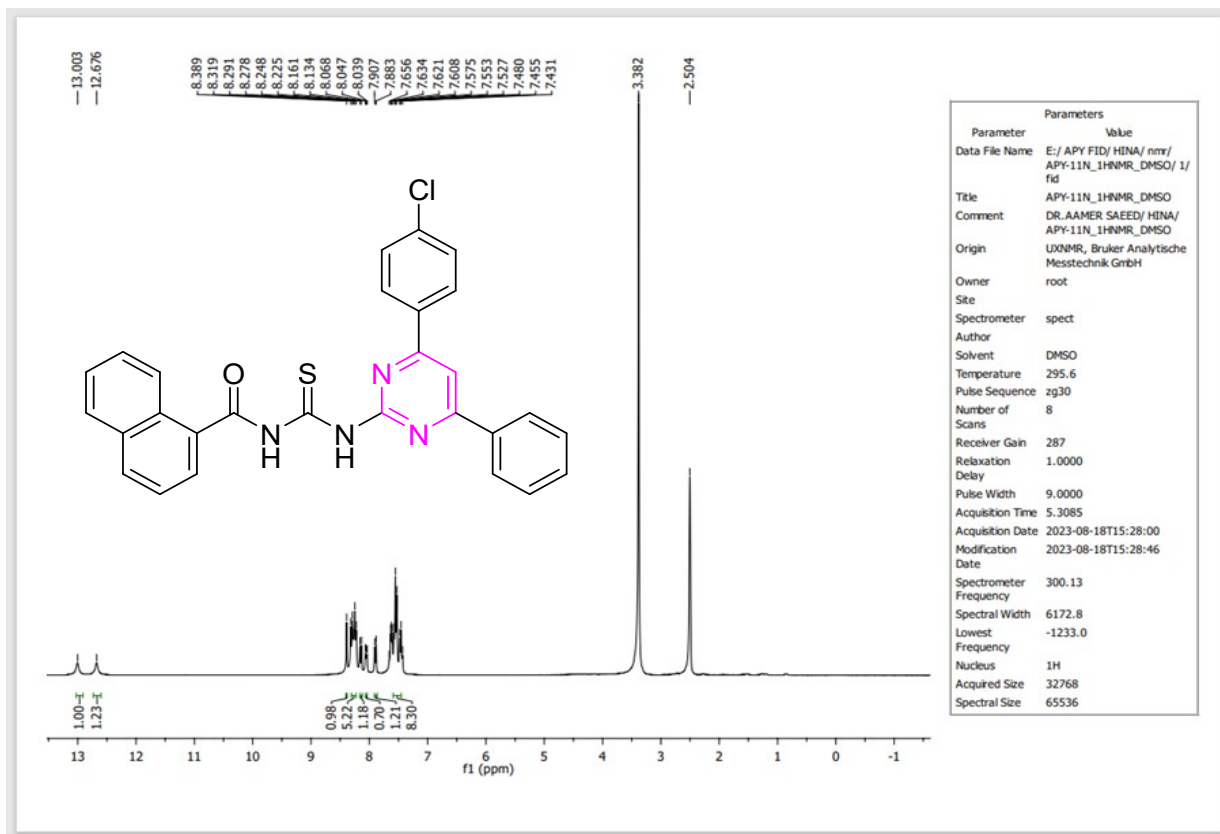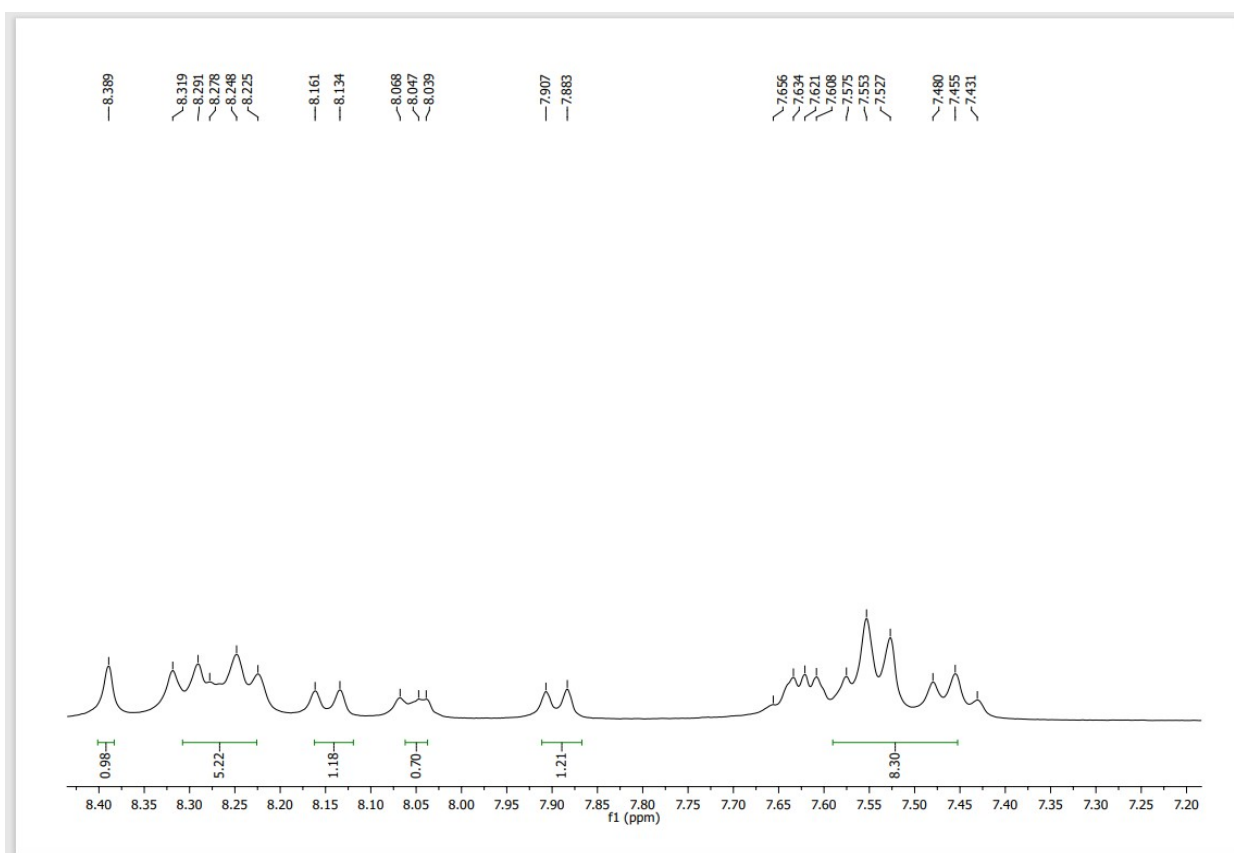

Figure 22. <sup>1</sup>H-NMR Spectrum of compound (6h)

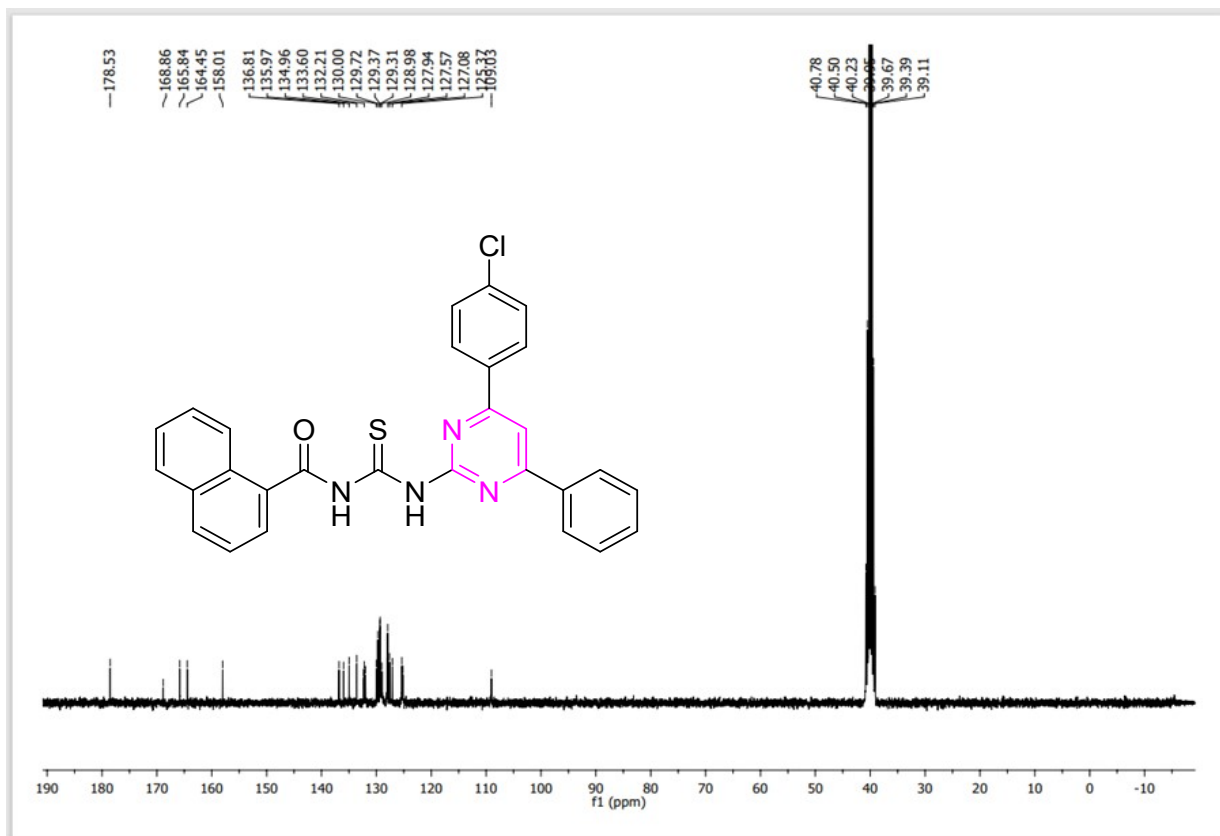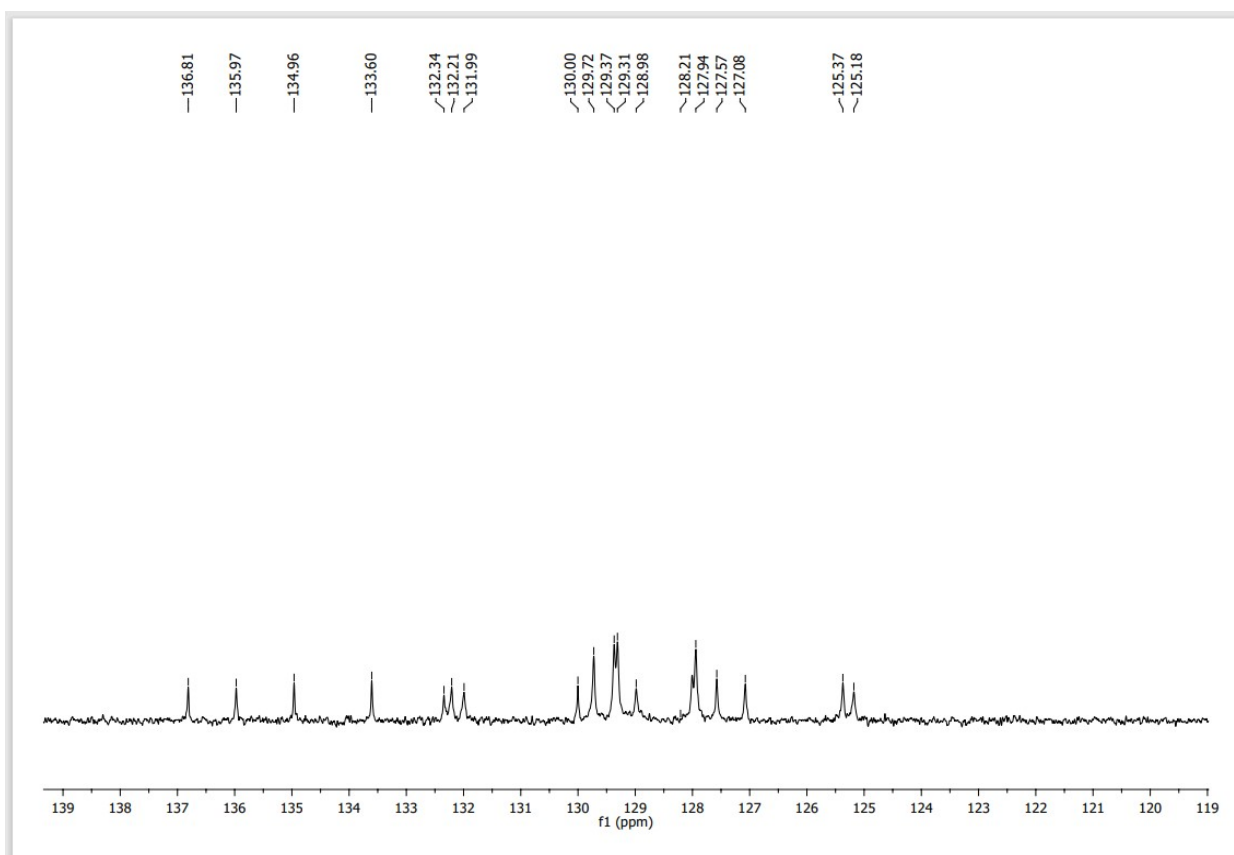

**Figure 23.**  $^{13}\text{C}$ -NMR Spectrum of compound (6h)

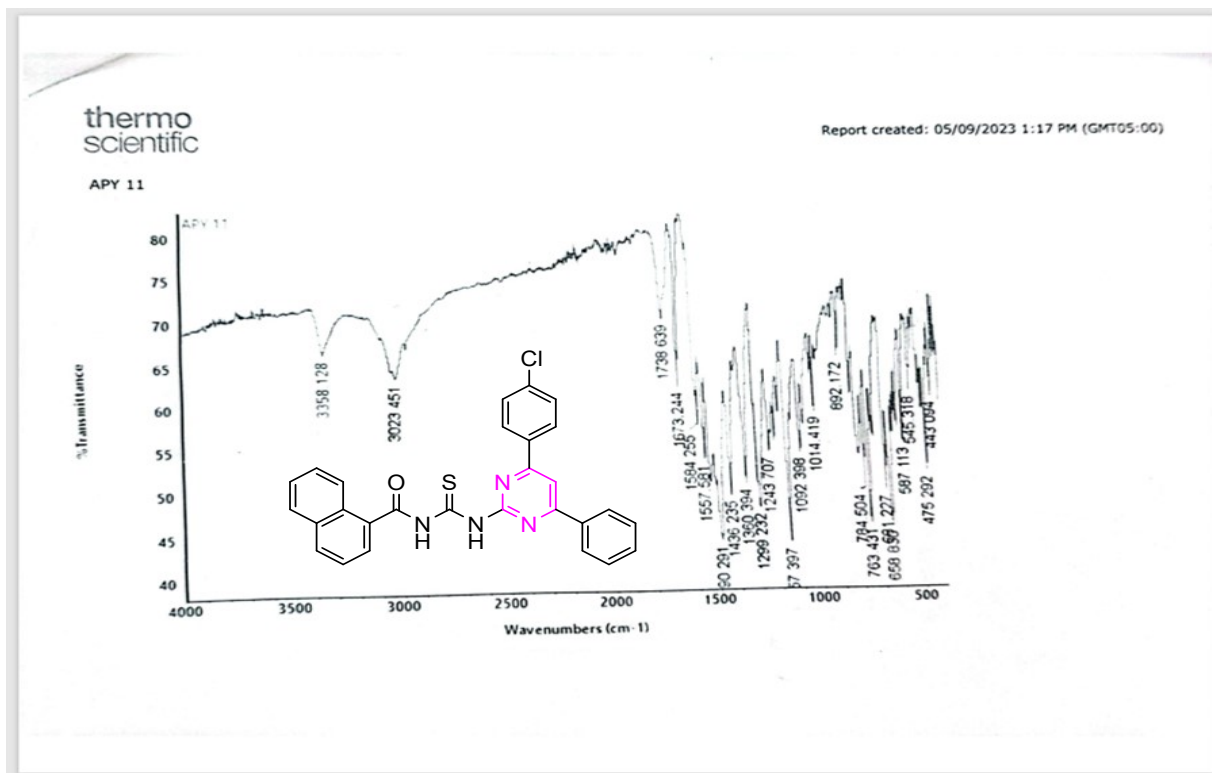

Figure 24. FT-IR Spectrum of compound (6h)

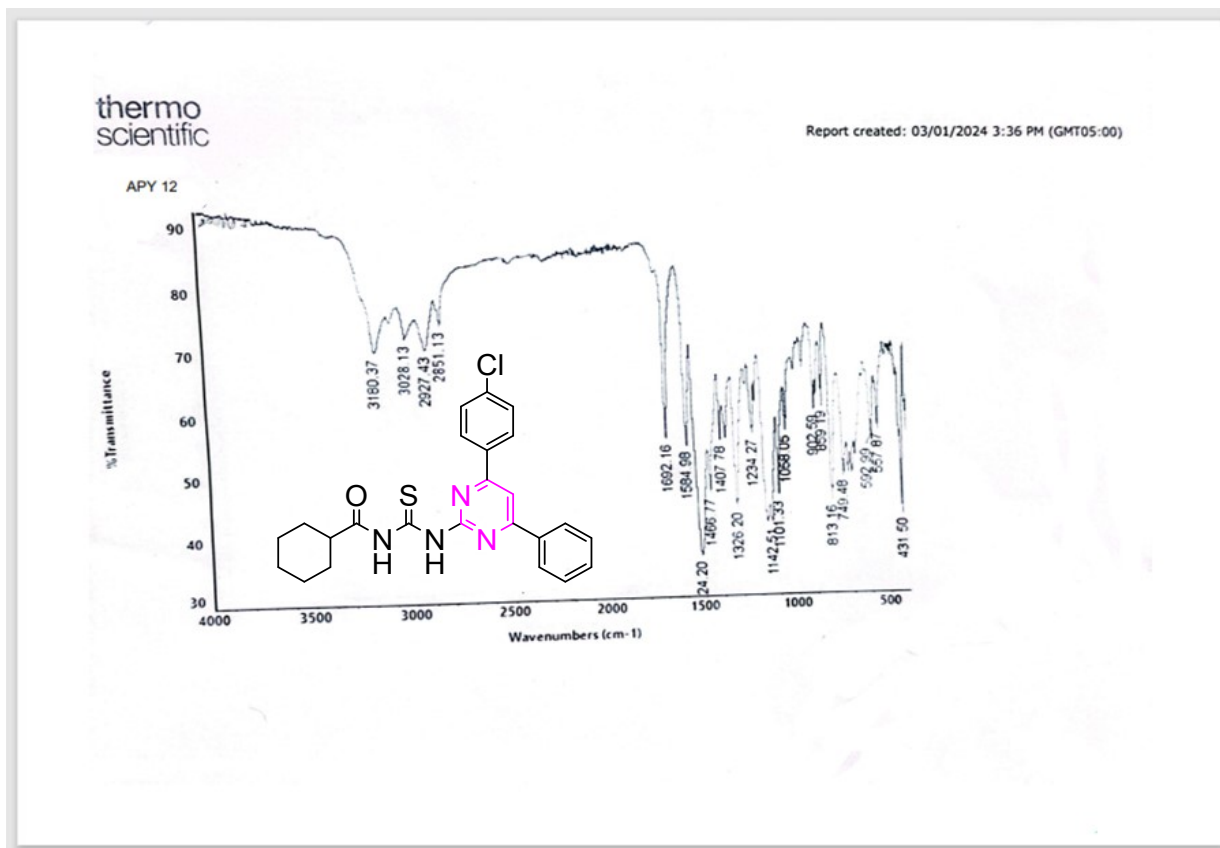

Figure 25. FT-IR Spectrum of compound (6i)

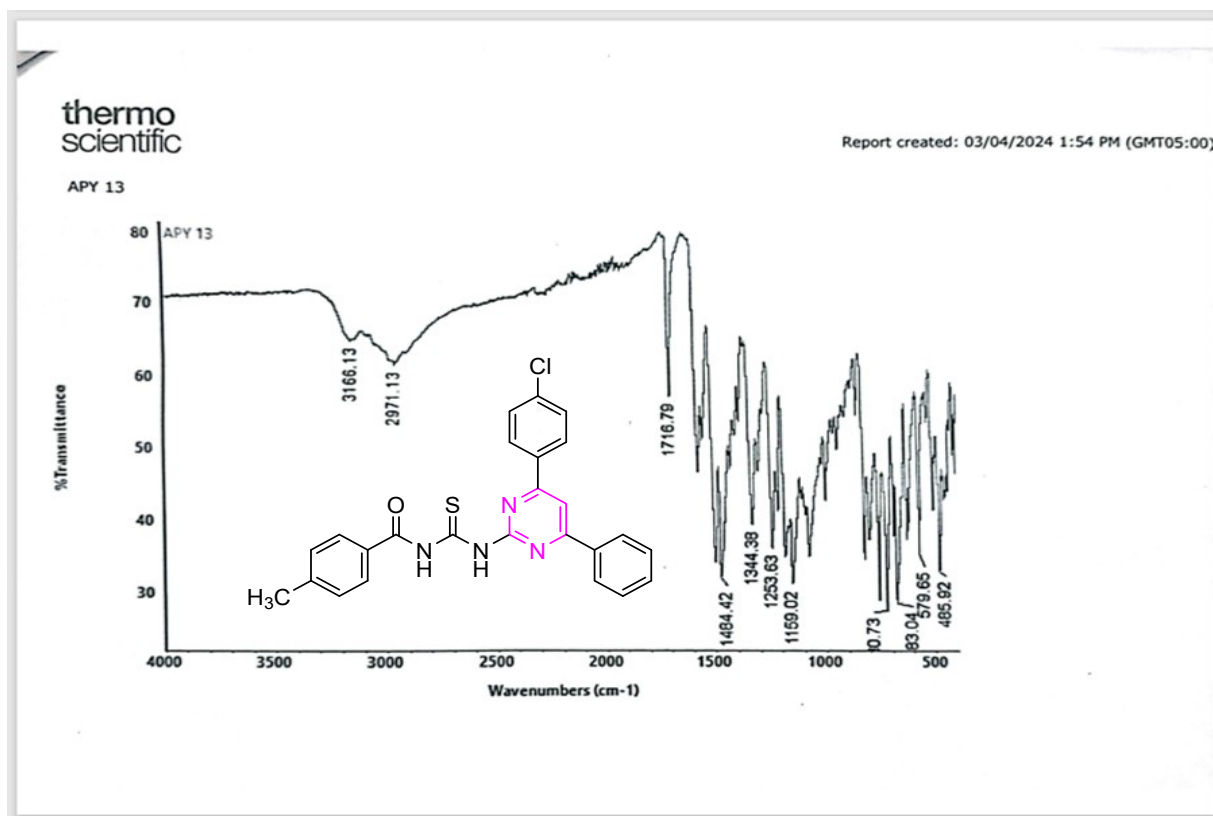

Figure 26. FT-IR Spectrum of compound (6j)

6a

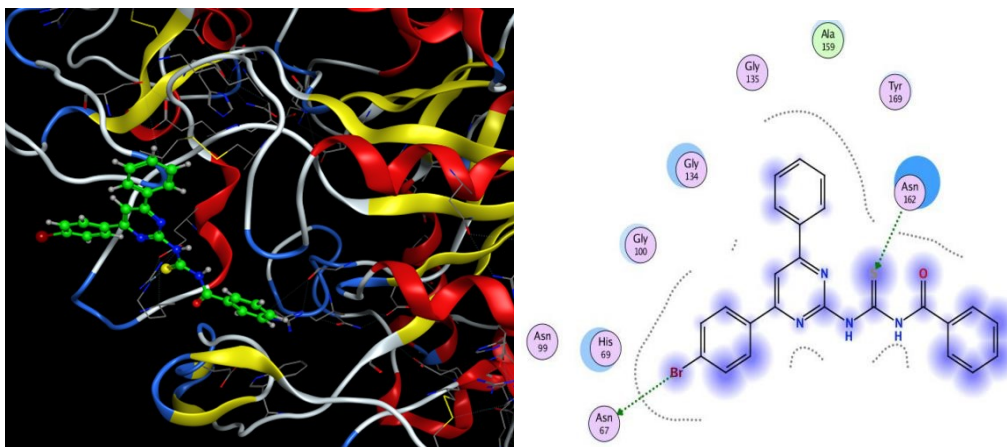



6b

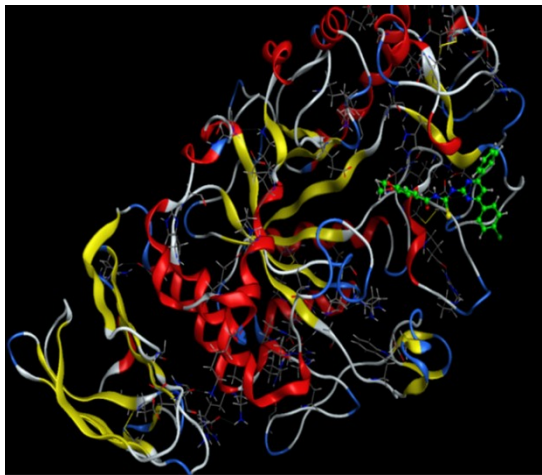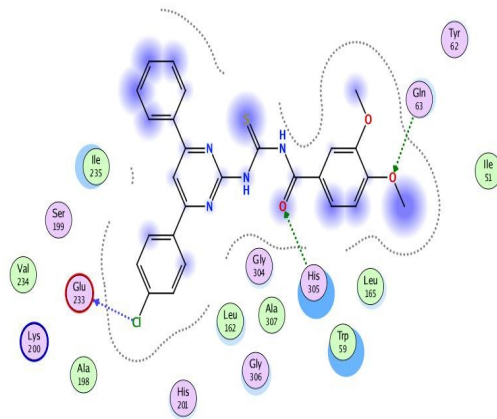

6c

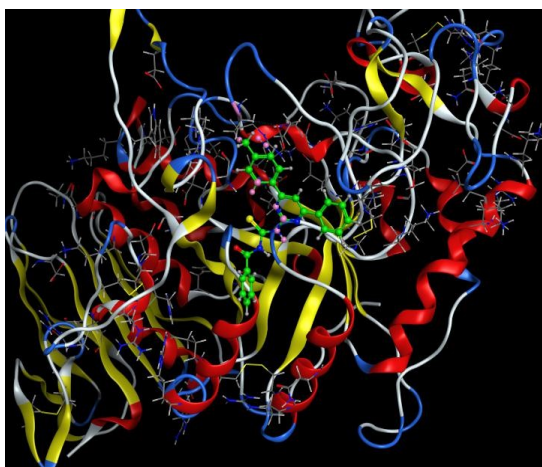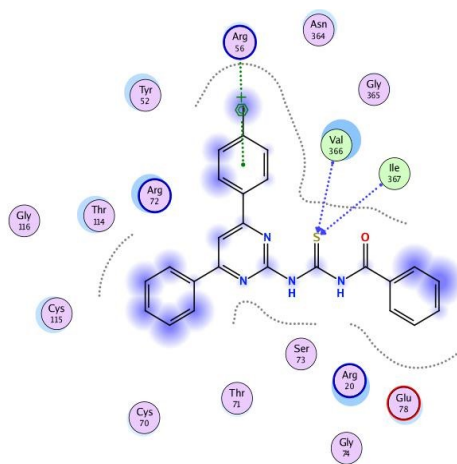

6d

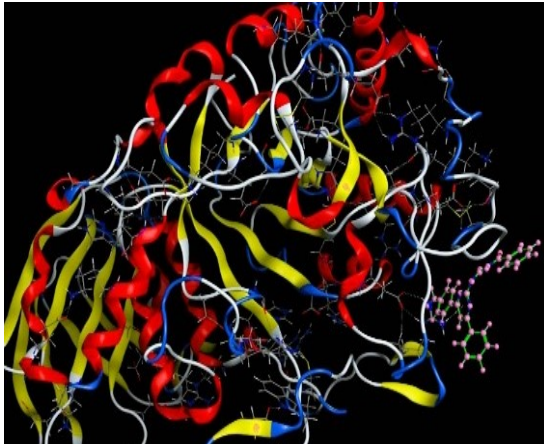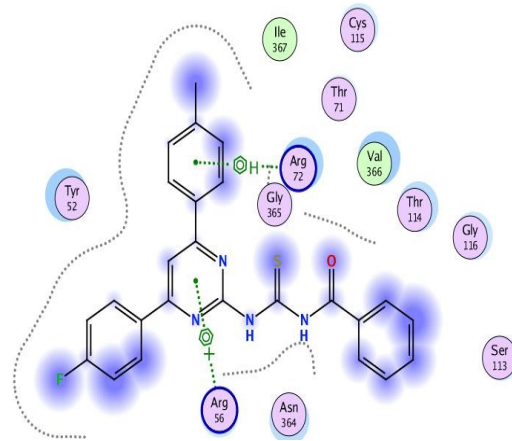

6e

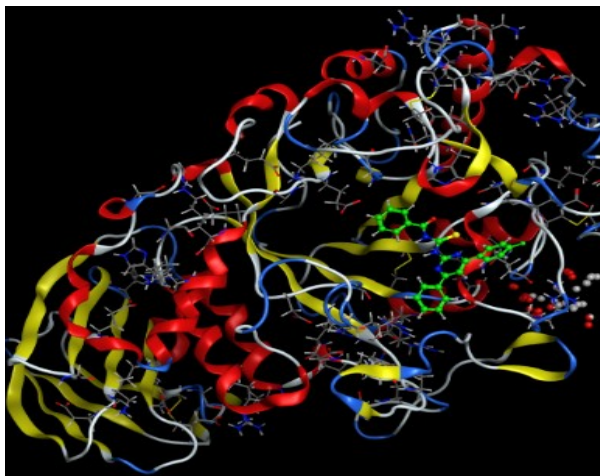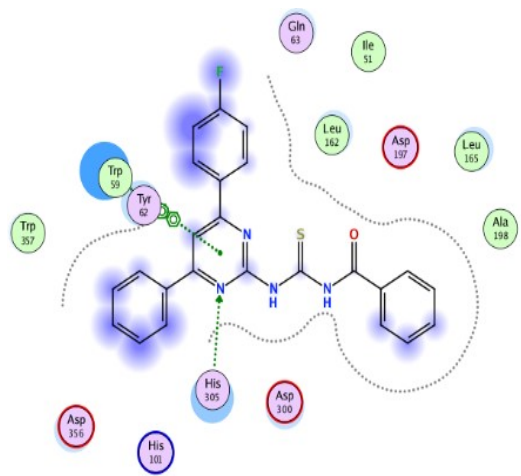

6f

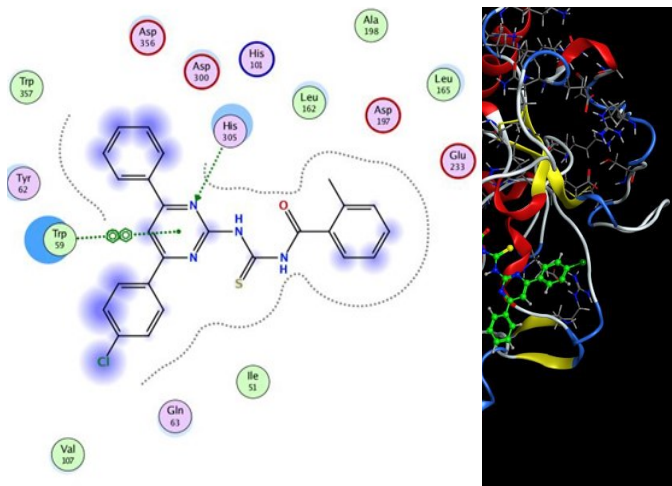

6g

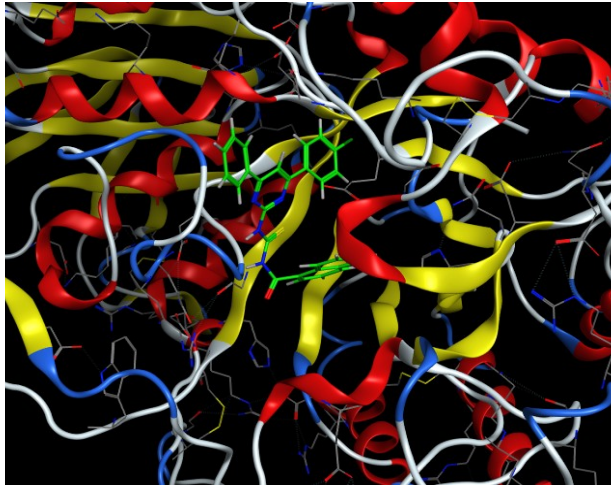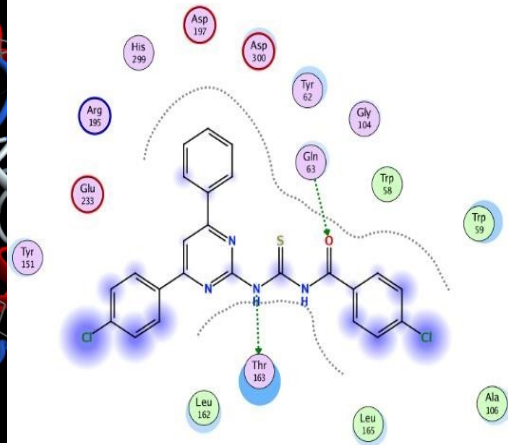

6h

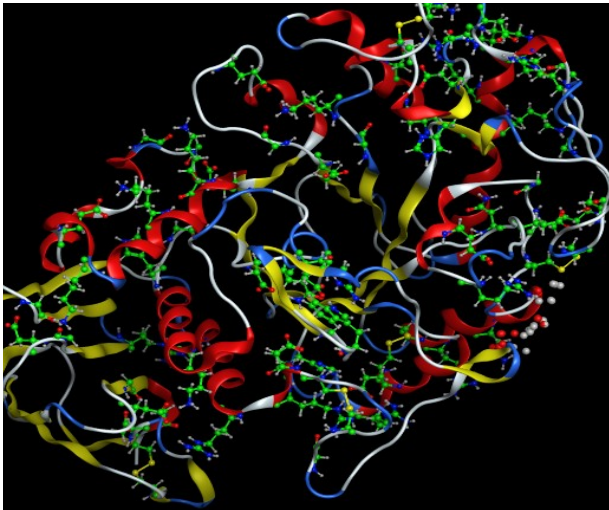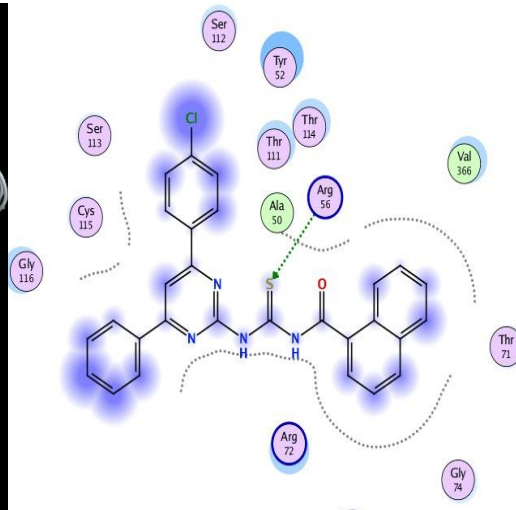

6i

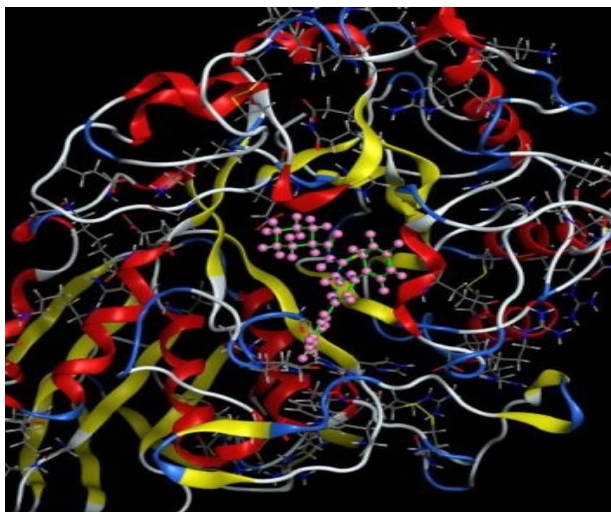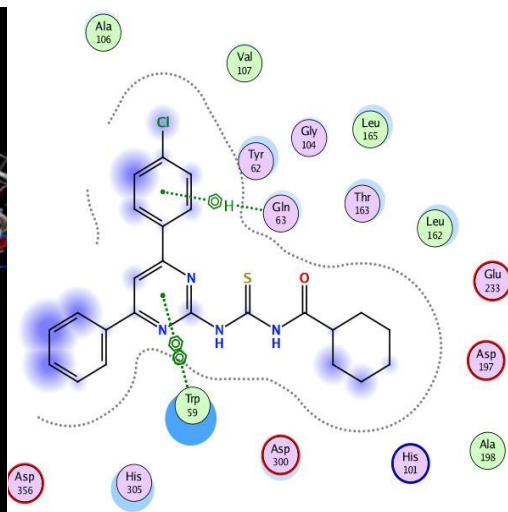

6j

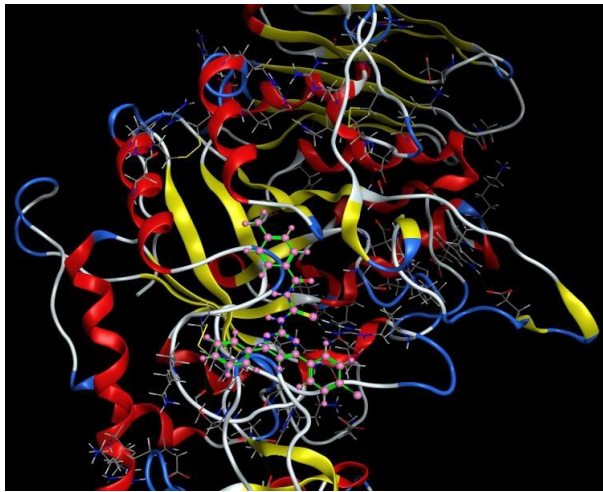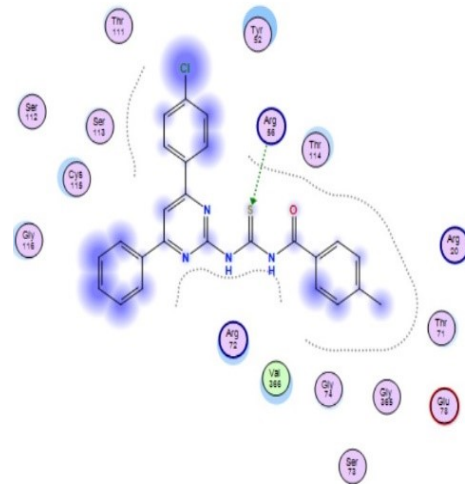

**Fig 27.** 3D docking pose and 2D binding interaction of the synthesized compounds (**6a-j**) in the binding pocket of  $\alpha$ -amylase

**6a**

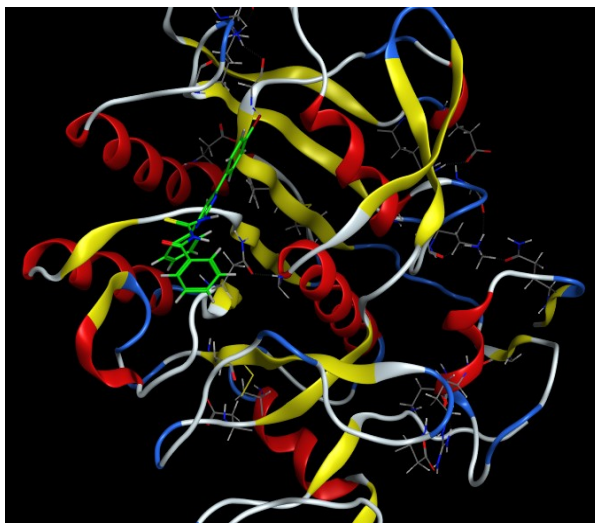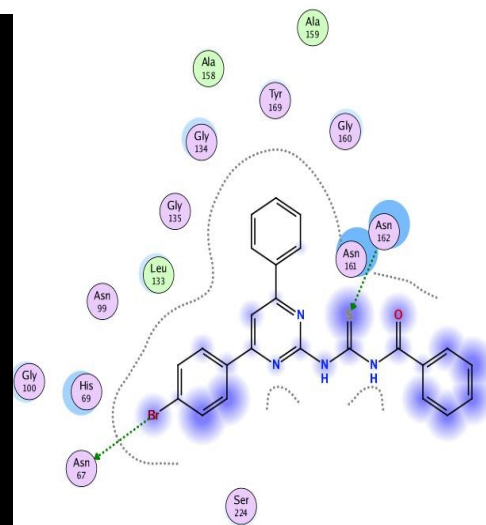

**6b**

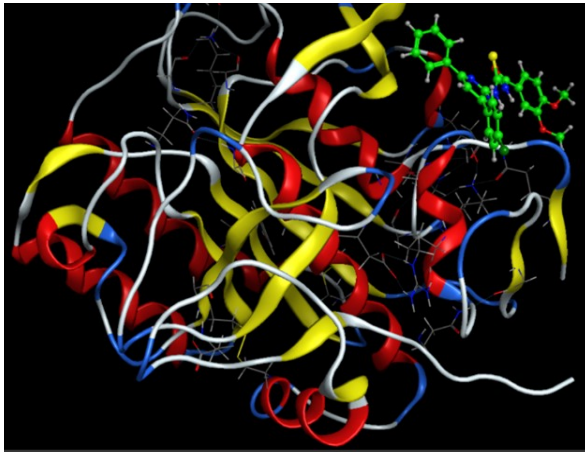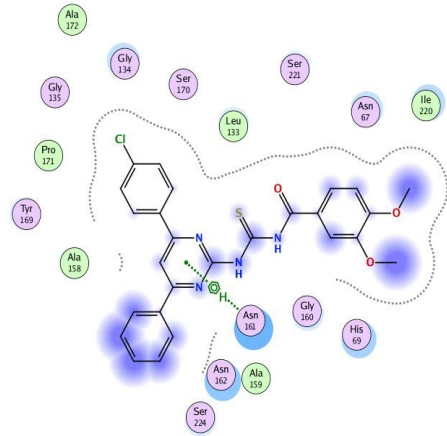

6c

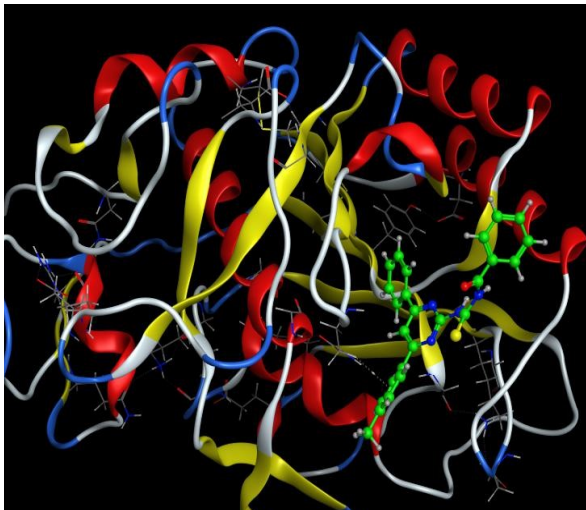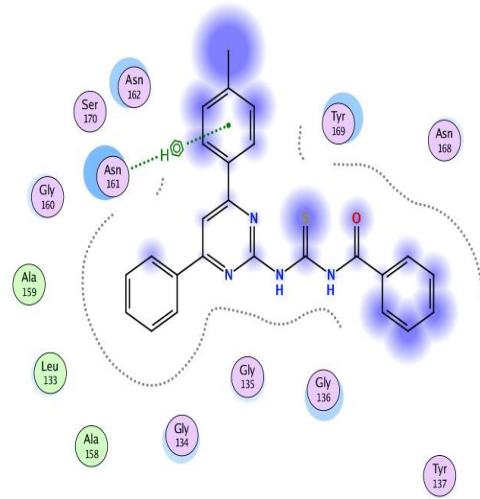

6d

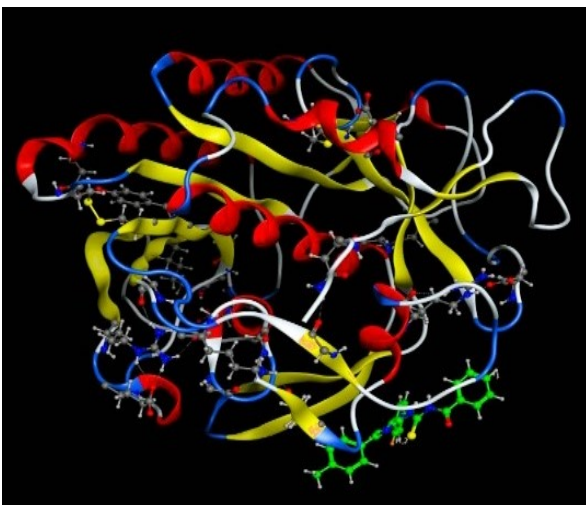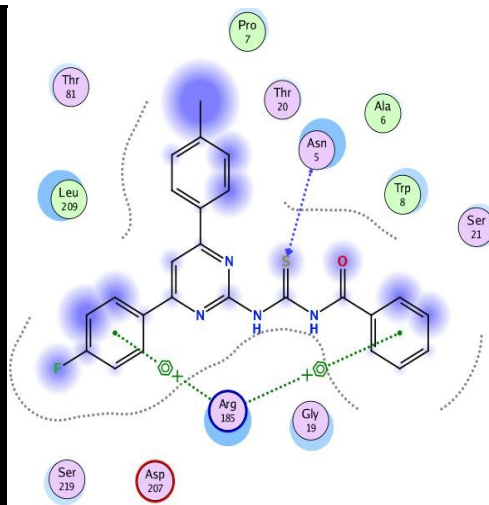

6e

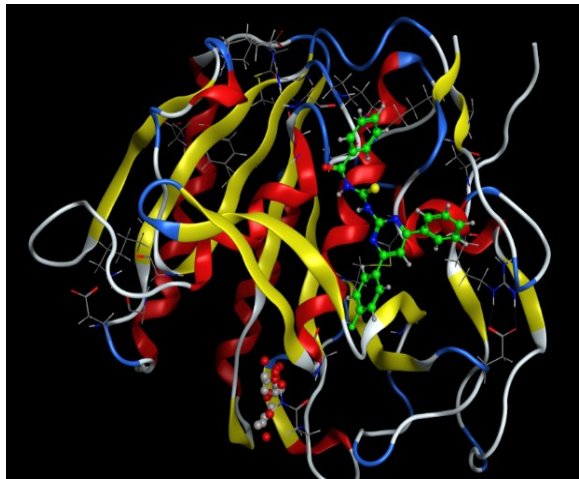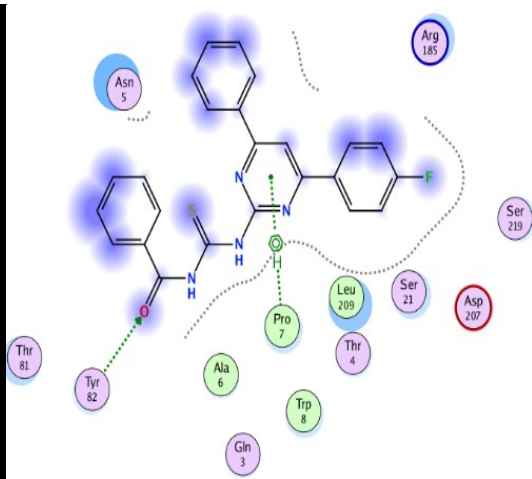

6f

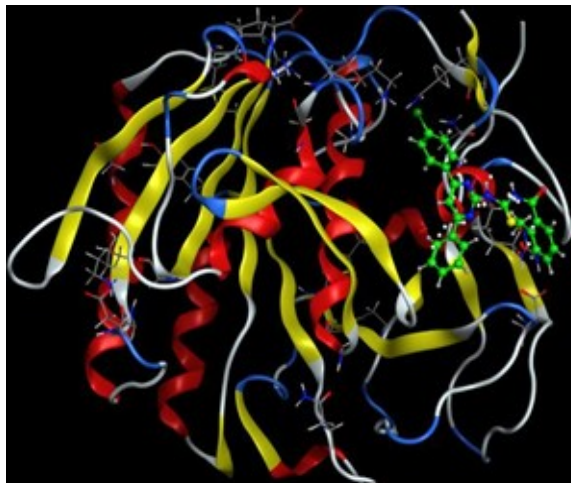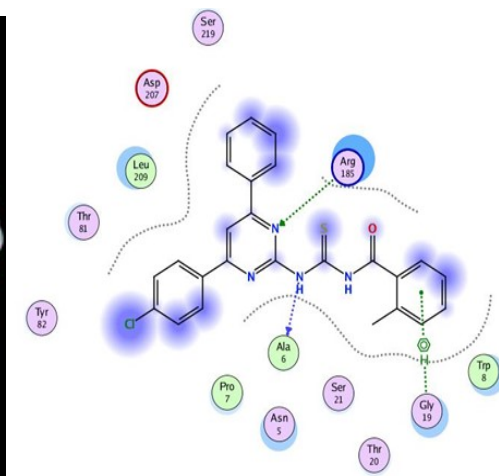

6g

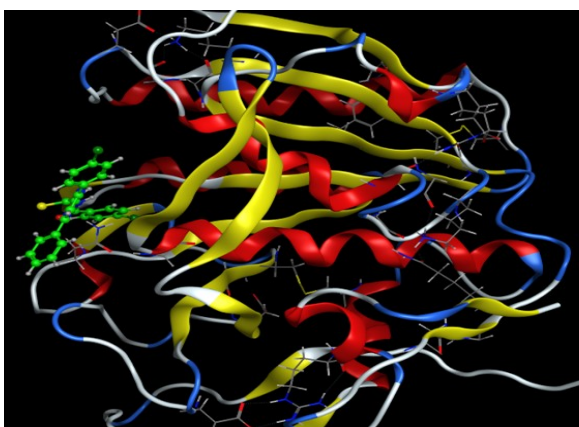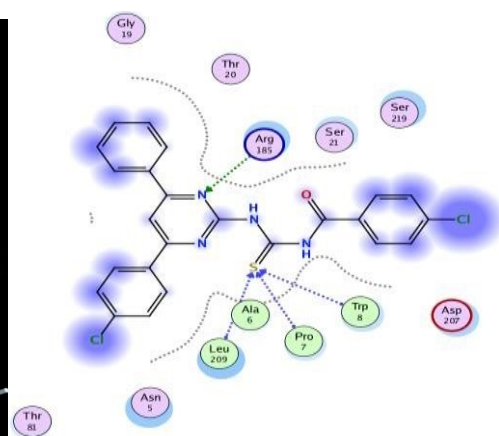

6h

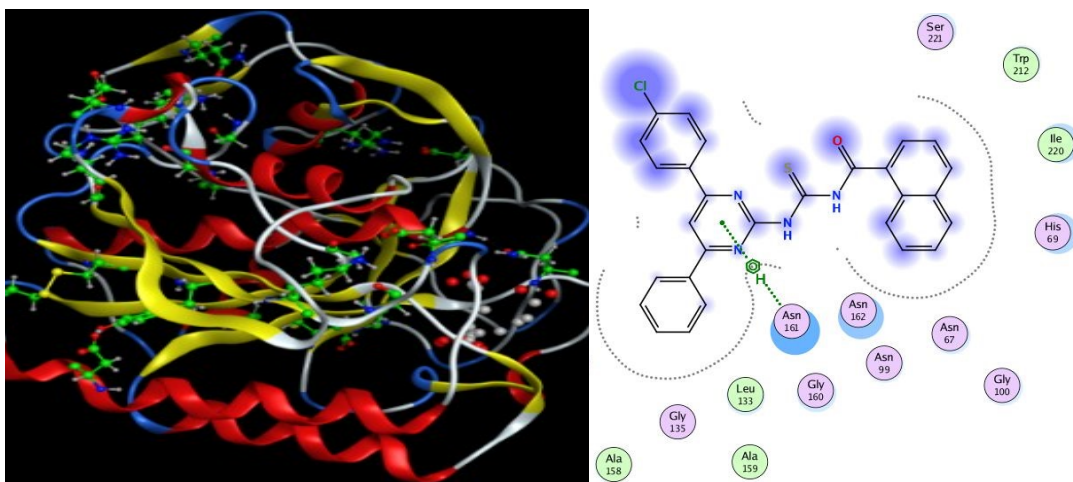

6i

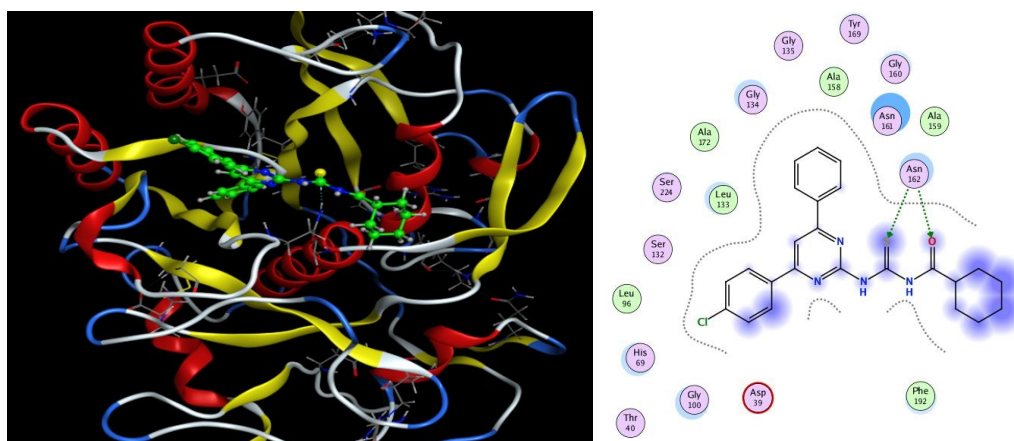

6j

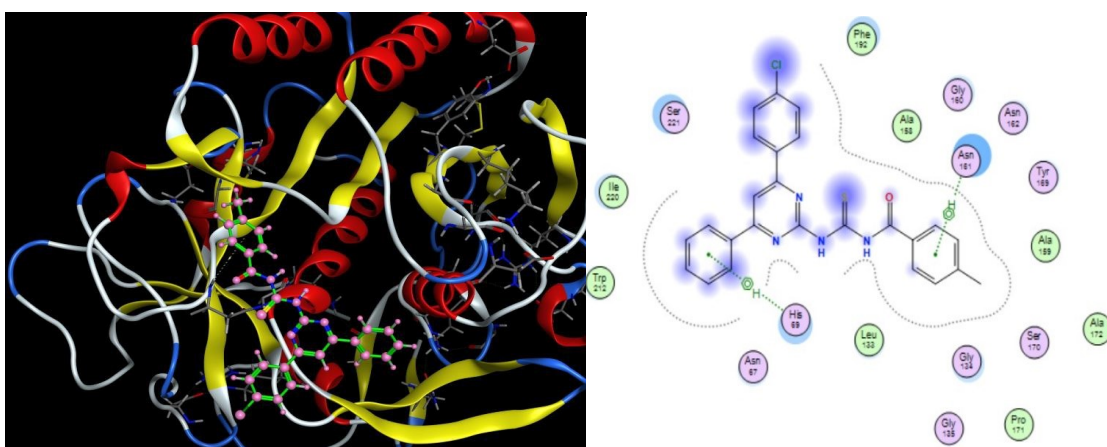

**Fig 28.** 3D docking pose and 2D binding interaction of the synthesized compounds (6a-j) in the binding pocket of Proteinase K
